# Supplementary material for: CPh3 as a functional group in P-heterocyclic chemistry: elimination of HCPh3 in the reaction of P-CPh3 substituted Li/Cl phosphinidenoid complexes with Ph2CO
Source: Royal Society of Chemistry journal article supplement (doi:10.1039/c5dt04595a), 2016-01-01
Supplement: c5dt04595a1.pdf [file c5dt04595a1.pdf]

## Electronic Supplementary Information (ESI)

---

### **CPh<sub>3</sub> as a functional group in P-heterocyclic chemistry: elimination of HCPPh<sub>3</sub> in the reaction of *P*-CPh<sub>3</sub> substituted Li/Cl phosphinidenoid complexes with Ph<sub>2</sub>C=O**

---

Cristina Murcia García,<sup>a</sup> Arturo Espinosa Ferao,<sup>\*b</sup> Gregor Schnakenburg<sup>a</sup> and Rainer Streubel<sup>\*a</sup>

#### Table of contents

|                                                                                                                            | <u>Page</u> |
|----------------------------------------------------------------------------------------------------------------------------|-------------|
| 1. <b>X-ray data</b> .....                                                                                                 | 2           |
| 3. <b>Table S 1.</b> Energetics computed at different levels for the transformation<br><b>3→4,8</b> in model systems ..... | 5           |
| 3. <b>Table S 2.</b> Energetics computed at different levels for the transformation<br><b>8e→11e</b> .....                 | 5           |
| 4. <b>Computed structures:</b> Cartesian coordinates and energies for all computed species .....                           | 6           |

## X ray data

### Crystal structure data of complex 3a

Summary of Data CCDC 1423351; Empirical formula:  $C_{31}H_{21}CrO_6P$ ; Moiety formula:  $C_{31}H_{21}CrO_6P$   
Formula weight: 572.45; Temperature/K: 123.(2); Crystal system: orthorhombic; Space group: P 21 21 21;  $a/\text{\AA}$ : 8.5858(5);  $b/\text{\AA}$ : 19.6165(9);  $c/\text{\AA}$ : 15.6007(10);  $\alpha/^\circ$ : 90;  $\beta/^\circ$ : 90;  $\gamma/^\circ$ : 90; Volume/ $\text{\AA}^3$ : 2627.5(3);  $Z$ : 4;  $\rho_{\text{calc}}/\text{mg}/\text{mm}^3$ : 1.447;  $m/\text{mm}^{-1}$ : 0.541;  $F(000)$ : 1176; Crystal size/ $\text{mm}^3$ :  $0.15 \times 0.12 \times 0.04$ ;  $\Theta$  range for data collection: 2.90 to  $28^\circ$ ; Index ranges:  $-11 \leq h \leq 11$ ,  $-22 \leq k \leq 25$ ,  $-20 \leq l \leq 20$ ; Reflections collected: 14343; Independent reflections: 6334; [ $R_{\text{int}} = 0.0754$ ]; Data/restraints/parameters: 6334/4/356; Goodness-of-fit on  $F^2$ : 0.623; Final R indexes [ $I \geq 2\sigma(I)$ ]:  $R_1 = 0.0409$ ,  $wR_2 = 0.0495$ ; Final R indexes [all data]:  $R_1 = 0.0816$ ,  $wR_2 = 0.0567$ ; Largest diff. peak/hole /  $e \text{\AA}^{-3}$ : 0.622/-0.408.

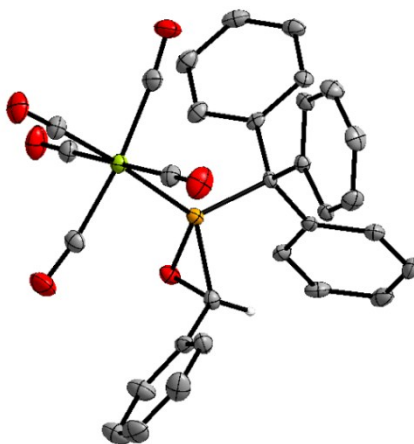

**Figure 1.** Crystal structure of complex 3a. Diamond 3.0 (ellipsoids 50% probability). Hydrogen atoms, except for that at the endocyclic carbon atom, were removed for clarity.

### Crystal structure data of complex 3b

Summary of Data CCDC 1423352; Empirical formula:  $C_{31}H_{21}MoO_6P$ ; Moiety formula:  $C_{31}H_{21}CrO_6P$   
Formula weight: 616.39; Temperature/K: 123.(2); Crystal system: orthorhombic; Space group: P 21 21 21;  $a/\text{\AA}$ : 8.6515(3);  $b/\text{\AA}$ : 15.6935(4);  $c/\text{\AA}$ : 19.9770(8);  $\alpha/^\circ$ : 90;  $\beta/^\circ$ : 90;  $\gamma/^\circ$ : 90; Volume/ $\text{\AA}^3$ : 2712.32(16);  $Z$ : 4;  $\rho_{\text{calc}}/\text{mg}/\text{mm}^3$ : 1.509;  $m/\text{mm}^{-1}$ : 0.586;  $F(000)$ : 1248; Crystal size/ $\text{mm}^3$ :  $0.10 \times 0.03 \times 0.02$ ;  $\Theta$  range for data collection: 2.88 to  $28^\circ$ ; Index ranges:  $-11 \leq h \leq 11$ ,  $-20 \leq k \leq 20$ ,  $-26 \leq l \leq 21$ ; Reflections collected: 19516; Independent reflections: 6550; [ $R_{\text{int}} = 0.0826$ ]; Data/restraints/parameters: 6550/0/356; Goodness-of-fit on  $F^2$ : 0.840; Final R indexes [ $I \geq 2\sigma(I)$ ]:  $R_1 = 0.0432$ ,  $wR_2 = 0.0549$ ; Final R indexes [all data]:  $R_1 = 0.0646$ ,  $wR_2 = 0.0585$ ; Largest diff. peak/hole /  $e \text{\AA}^{-3}$ : 0.592/-0.653.

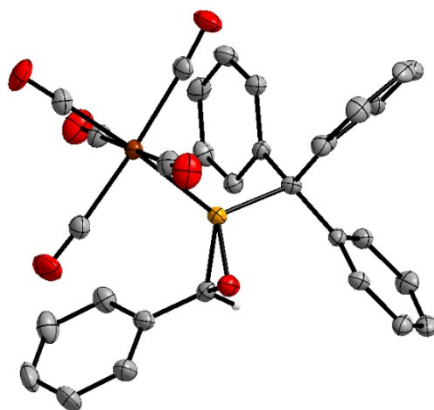

**Figure 2.** Crystal structure of complex **3b**. Diamond 3.0 (ellipsoids 50% probability). Hydrogen atoms, except for that at the endocyclic carbon atom, were removed for clarity.

### Crystal structure data of complex **4f**

Summary of Data CCDC 1423354; Empirical formula:  $C_{37}H_{25}O_6PW$ ; Moiety formula:  $C_{37}H_{25}O_6PW$   
 Formula weight: 780.39; Temperature/K: 123.15; Crystal system: triclinic; Space group: P -1;  $a/\text{\AA}$ : 9.4174(14);  $b/\text{\AA}$ : 10.7473(14);  $c/\text{\AA}$ : 17.631(2);  $\alpha/^\circ$ : 98.301(4);  $\beta/^\circ$ : 94.830(4);  $\gamma/^\circ$ : 112.865(4);  
 Volume/ $\text{\AA}^3$ : 1607.6(4); Z: 2;  $\rho_{\text{calc}}/\text{mg/mm}^3$ : 1.612;  $m/\text{mm}^{-1}$ : 3.688; F(000): 768.0; Crystal size/ $\text{mm}^3$ :  $0.06 \times 0.04 \times 0.03$ ;  $\Theta$  range for data collection: 5.46 to 50.5°; Index ranges:  $-11 \leq h \leq 11$ ,  $-12 \leq k \leq 12$ ,  $-21 \leq l \leq 19$ ; Reflections collected: 14721; Independent reflections: 5711; [ $R_{\text{int}} = 0.0995$ ];  
 Data/restraints/parameters: 5711/18/406; Goodness-of-fit on  $F^2$ : 0.962; Final R indexes [ $I \geq 2\sigma(I)$ ]:  $R_1 = 0.0498$ ,  $wR_2 = 0.0702$ ; Final R indexes [all data]:  $R_1 = 0.0893$ ,  $wR_2 = 0.0809$ ; Largest diff. peak/hole /  $e \text{\AA}^{-3}$ : 1.27/-1.70.

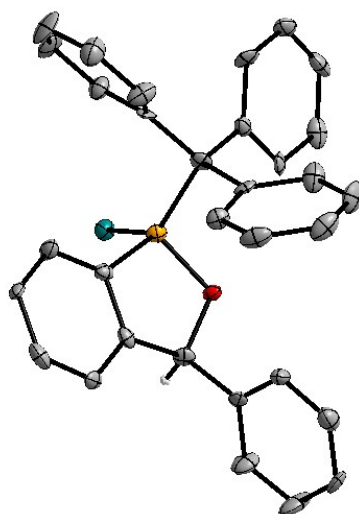

**Figure 3.** Crystal structure of complex **4f**. Diamond 3.0 (ellipsoids 50% probability). Hydrogen atoms (except those at chiral centres), as well as carbonyl groups at the metal, were removed for clarity.

### Crystal structure data of complex 5e

Summary of Data CCDC 1423353; Empirical formula:  $C_{59}H_{44}Mo_2O_{13}P_2$ ; Moiety formula:  $C_{55}H_{34}Mo_2O_{12}P_2$ ,  $C_4H_{10}O$  Formula weight: 1214.76; Temperature/K: 123(2); Crystal system: monoclinic; Space group: P 21/c; a/Å: 13.286(8); b/Å: 18.409(9); c/Å: 23.093(10);  $\alpha/^\circ$ : 90;  $\beta/^\circ$ : 103.99;  $\gamma/^\circ$ : 90; Volume/Å<sup>3</sup>: 5481(5); Z: 4;  $\rho_{calc}$ /mg/mm<sup>3</sup>: 1.472; m/mm<sup>-1</sup>: 0.580; F(000): 2464; Crystal size/mm<sup>3</sup>: 0.36 × 0.06 × 0.03;  $\Theta$  range for data collection: 2.94 to 28°; Index ranges:  $-17 \leq h \leq 17$ ,  $-24 \leq k \leq 23$ ,  $-30 \leq l \leq 30$ ; Reflections collected: 51069; Independent reflections: 13213; [ $R_{int}$  = 0.1524]; Data/restraints/parameters: 13213/37/687; Goodness-of-fit on  $F^2$ : 0.789; Final R indexes [ $I \geq 2\sigma(I)$ ]:  $R_1 = 0.0492$ ,  $wR_2 = 0.0858$ ; Final R indexes [all data]:  $R_1 = 0.1109$ ,  $wR_2 = 0.0985$ ; Largest diff. peak/hole / e Å<sup>-3</sup>: 0.893/-0.985.

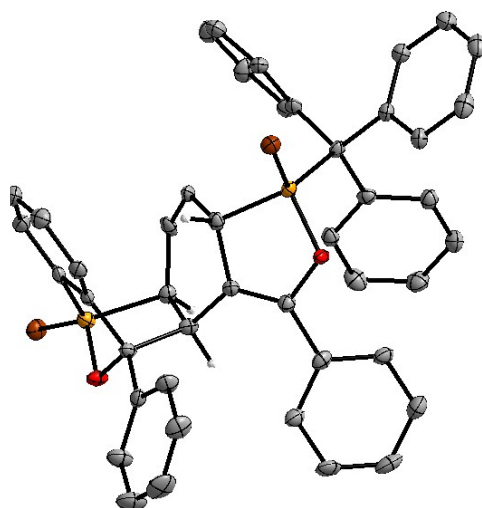

**Figure 4.** Crystal structure of complex 5e. Diamond 3.0 (ellipsoids 50% probability). Hydrogen atoms (except those at chiral centres), as well as carbonyl groups at the metal, were removed for clarity. The crystal structure contains one molecule of diethylether, which was removed for clarity.

**Table S 1.** Energetics of reactions involved in mechanistic pathway from **3g,h**.<sup>[a]</sup>

|               | <b>3g</b> | <b>TS</b> <sup>(3g→6g)</sup> | <b>6g</b> | <b>TS</b> <sup>(3g→7g)</sup> | <b>7g</b> | <b>3h</b> | <b>TS</b> <sup>(3h→6h)</sup> | <b>6h</b> | <b>TS</b> <sup>(3h→7h)</sup> |
|---------------|-----------|------------------------------|-----------|------------------------------|-----------|-----------|------------------------------|-----------|------------------------------|
| B3LYP-D3      | 0.00      | 26.38                        | -1.44     | 37.01                        | 28.34     | 0.00      | 16.07                        | 17.32     | 27.94                        |
| PWPB95-D3     | 0.00      | 25.08                        | -7.00     | 34.65                        | 26.39     | 0.00      | 22.14                        | -3.25     | 33.71                        |
| SCS-MP2       | 0.00      | 29.42                        | -9.53     | 39.93                        | 29.70     | 0.00      | 27.43                        | -5.80     | 38.95                        |
| LPNO-NCEPA1   | 0.00      | 30.02                        | -6.35     | 38.29                        | 28.24     | 0.00      | 27.99                        | -0.71     | 38.18                        |
| DLPNO-CCSD(T) | 0.00      | 28.91                        | -6.57     | 37.72                        | 28.90     | 0.00      | 27.15                        | -2.01     | 37.11                        |

**Table S 1.** Continued

| <b>7h</b> | <b>TS</b> <sup>(7h→8h)</sup> | <b>8h</b> | <b>7h'</b> | <b>TS</b> <sup>(7h'→8h')</sup> | <b>8h'</b> | <b>TS</b> <sup>(8h'→4h)</sup> | <b>4h</b> | <b>4h'</b> | <b>TS</b> <sup>(8h'·H2O→4h·H2O)</sup> |
|-----------|------------------------------|-----------|------------|--------------------------------|------------|-------------------------------|-----------|------------|---------------------------------------|
| 15.94     | 27.50                        | 3.03      | 17.19      | 26.20                          | 3.01       | 56.19                         | -28.37    | -24.18     | 37.97                                 |
| 21.91     | 33.07                        | 3.12      | 23.05      | 30.98                          | 3.57       | 57.09                         | -22.41    | -22.93     | 40.51                                 |
| 27.68     | 40.36                        | 4.17      | 28.83      | 36.38                          | 4.25       | 58.86                         | -23.09    | -23.86     | 44.10                                 |
| 25.89     | 40.58                        | 2.10      | 27.37      | 36.88                          | 1.49       | 61.81                         | -23.66    | -24.60     | 47.20                                 |
| 25.98     | 39.19                        | 3.02      | 27.37      | 35.88                          | 2.72       | 61.63                         | -23.48    | -24.18     | 45.01                                 |

**Table S 1.** Continued

| <b>TS</b> <sup>(8h'·2H2O→9h·2H2O)</sup> | <b>9h·H<sub>2</sub>O</b> | <b>TS</b> <sup>(9h·2H2O→4h·2H2O)</sup> | <b>13</b> | <b>RMSD</b> <sup>[b]</sup> |
|-----------------------------------------|--------------------------|----------------------------------------|-----------|----------------------------|
| 24.53                                   | 23.38                    | 22.23                                  | -26.28    | 1.80                       |
| 27.31                                   | 27.61                    | 25.92                                  | -25.72    | 0.79                       |
| 31.37                                   | 30.49                    | 30.12                                  | -27.20    | 0.36                       |
| 32.91                                   | 33.74                    | 32.37                                  | -25.77    | 0.32                       |
| 31.50                                   | 29.73                    | 29.99                                  | -26.58    | 0.00                       |

<sup>[a]</sup> ZPE-corrected relative energies (to **3g** or **3h** in the **g** and **h** series, or to **11** in case of **12**), in kcal/mol, using the def2-TZVPP basis set, COSMO(THF) solvation and the geometries and zero-point correction at COSMO<sub>THF</sub>/B3LYP -D3/def2-TZVPecp. <sup>[b]</sup> Root mean square deviation of the seventeen data set (removing **3g** and **3h**) with respect to the reference DLNPO-CCSD(T) level.

**Table S 2.** Relative energies for products arising from **8e**.<sup>[a]</sup>

|           | <b>8e</b> | <b>TS</b> <sup>(8e→10e)</sup> | <b>10e</b> | <b>TS</b> <sup>(10→11e·12)</sup> | <b>11e·12</b> | <b>11e+13</b> | <b>TS</b> <sup>(8e→11e·12)</sup> |
|-----------|-----------|-------------------------------|------------|----------------------------------|---------------|---------------|----------------------------------|
| B3LYP-D3  | 0.00      | 25.20                         | 20.67      | 19.37                            | 5.85          | -5.74         | 31.09                            |
| PWPB95-D3 | 0.00      | 29.46                         | 22.97      | 22.75                            | 11.68         | 1.65          | 33.97                            |
| SCS-MP2   | 0.00      | 26.46                         | 18.24      | 19.14                            | 13.37         | 4.29          | 32.46                            |

<sup>[a]</sup> ZPE-corrected relative energies (to **8e**), in kcal/mol, using the def2-TZVPP basis set, COSMO(THF) solvation and the geometries and zero-point correction at COSMO<sub>THF</sub>/B3LYP-D3/def2-TZVPecp.

## Calculated structures.

Cartesian coordinates (in Å) and energies (hartrees) for all computed species.-

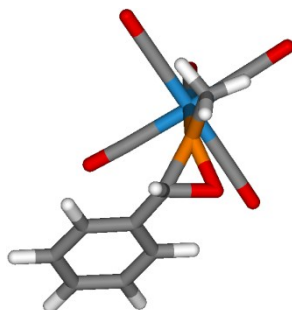

**3g:** E = -1358.33470326679 au  
ZPE = 0.19138974 au

|   |           |           |           |   |          |           |           |
|---|-----------|-----------|-----------|---|----------|-----------|-----------|
| C | 0.113797  | 0.086263  | 1.279092  | C | 2.129681 | -1.420868 | 2.762066  |
| O | 1.339522  | -0.048450 | 0.492213  | H | 1.497997 | -2.196265 | 2.331181  |
| C | -0.722091 | 1.275773  | 1.010687  | H | 3.176562 | -1.629704 | 2.535206  |
| C | -0.311227 | 2.272054  | 0.126653  | H | 2.009081 | -1.401275 | 3.846644  |
| C | -1.094205 | 3.405345  | -0.061260 | W | 2.878302 | 2.250452  | 2.900638  |
| C | -2.288211 | 3.554445  | 0.634285  | C | 3.893013 | 3.887213  | 3.560313  |
| C | -2.707347 | 2.555873  | 1.510251  | O | 4.472492 | 4.807590  | 3.926629  |
| C | -1.931457 | 1.420449  | 1.694614  | C | 2.589696 | 1.590505  | 4.833443  |
| H | 0.616317  | 2.152840  | -0.414300 | O | 2.427955 | 1.211511  | 5.902122  |
| H | -0.766549 | 4.174827  | -0.748756 | C | 1.113284 | 3.336399  | 3.032635  |
| H | -2.892835 | 4.441294  | 0.493674  | O | 0.172582 | 3.972618  | 3.152801  |
| H | -3.639351 | 2.664096  | 2.050388  | C | 3.121568 | 2.856791  | 0.937301  |
| H | -2.257130 | 0.645980  | 2.379007  | O | 3.247206 | 3.182834  | -0.151136 |
| H | -0.418032 | -0.854631 | 1.392417  | C | 4.653609 | 1.207359  | 2.829742  |
| P | 1.704939  | 0.213154  | 2.099101  | O | 5.645121 | 0.634356  | 2.807251  |

**TS(3g-6g):** E = -1358.28698322011 au  
ZPE = 0.18973676 au  
 $\nu = -108.27 \text{ cm}^{-1}$

|   |           |           |           |   |           |           |          |
|---|-----------|-----------|-----------|---|-----------|-----------|----------|
| C | 0.111013  | 0.400265  | 1.555517  | C | 2.177283  | -1.214983 | 2.478838 |
| O | 2.204287  | 0.498753  | 0.338914  | H | 1.777591  | -1.946026 | 1.773688 |
| C | -0.748223 | 1.400660  | 1.096282  | H | 3.249979  | -1.377254 | 2.590542 |
| C | -2.114272 | 1.070203  | 0.879369  | H | 1.703384  | -1.341902 | 3.453794 |
| C | -3.016901 | 2.040435  | 0.501760  | W | 2.845491  | 2.231083  | 3.433286 |
| C | -2.573750 | 3.348545  | 0.298841  | C | 3.710473  | 3.623288  | 4.641497 |
| C | -1.227638 | 3.692723  | 0.472120  | O | 4.200652  | 4.412771  | 5.318832 |
| C | -0.324090 | 2.737506  | 0.868857  | C | 2.596240  | 0.958976  | 5.035036 |
| H | -2.434665 | 0.048042  | 1.032873  | O | 2.459250  | 0.252687  | 5.927431 |
| H | -4.058617 | 1.791476  | 0.353978  | C | 0.981685  | 3.012092  | 3.825599 |
| H | -3.280800 | 4.109285  | -0.006258 | O | -0.060981 | 3.431841  | 4.054182 |
| H | -0.904331 | 4.709010  | 0.294197  | C | 3.096826  | 3.459245  | 1.795095 |
| H | 0.717365  | 2.985700  | 0.989589  | O | 3.234582  | 4.132200  | 0.878297 |
| H | -0.322569 | -0.597445 | 1.596920  | C | 4.672178  | 1.348588  | 3.045058 |
| P | 1.909821  | 0.481652  | 1.851225  | O | 5.673940  | 0.835278  | 2.835406 |

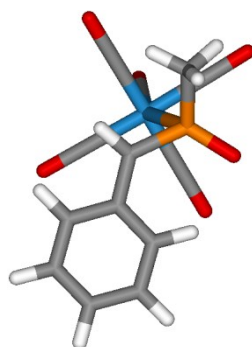

**6g:**

**E = -1358.34636887102 au**  
**ZPE = 0.19258566 au**

|   |           |          |           |   |           |           |          |
|---|-----------|----------|-----------|---|-----------|-----------|----------|
| C | 0.487072  | 0.770131 | 1.955108  | C | 2.524410  | -1.287237 | 2.013230 |
| O | 2.685555  | 0.812312 | 0.189644  | H | 2.223321  | -1.971216 | 1.218657 |
| C | -0.461100 | 1.649126 | 1.284318  | H | 3.602539  | -1.352733 | 2.152372 |
| C | -1.760603 | 1.760081 | 1.805133  | H | 2.015409  | -1.549162 | 2.938546 |
| C | -2.712116 | 2.551087 | 1.178969  | W | 2.325710  | 2.091306  | 3.532289 |
| C | -2.383582 | 3.256869 | 0.025339  | C | 3.236878  | 3.275294  | 4.903181 |
| C | -1.096831 | 3.157983 | -0.499909 | O | 3.761127  | 3.937937  | 5.676515 |
| C | -0.142784 | 2.364080 | 0.117242  | C | 2.096078  | 0.560837  | 4.893496 |
| H | -2.018013 | 1.217090 | 2.705977  | O | 1.960504  | -0.306592 | 5.627215 |
| H | -3.709305 | 2.621421 | 1.594423  | C | 0.473324  | 2.872118  | 4.098261 |
| H | -3.123557 | 3.878889 | -0.461714 | O | -0.535050 | 3.302971  | 4.406437 |
| H | -0.836712 | 3.702219 | -1.398877 | C | 2.483946  | 3.543922  | 2.057245 |
| H | 0.850872  | 2.286713 | -0.300529 | O | 2.568289  | 4.338361  | 1.243266 |
| H | 0.091972  | 0.138685 | 2.741274  | C | 4.241347  | 1.438026  | 3.113731 |
| P | 2.098498  | 0.389285 | 1.493511  | O | 5.308004  | 1.084887  | 2.906415 |

**TS(3g-7g):**

**E = -1358.27304448562 au**  
**ZPE = 0.18983653 au**  
 **$\nu = -185.01 \text{ cm}^{-1}$**

|   |           |           |           |   |          |           |           |
|---|-----------|-----------|-----------|---|----------|-----------|-----------|
| C | -0.307870 | 0.456655  | 1.614126  | C | 2.576166 | -1.367827 | 2.433645  |
| O | 0.949668  | 0.460115  | 1.272391  | H | 1.852807 | -2.163554 | 2.249016  |
| C | -1.174433 | 1.522947  | 1.255150  | H | 3.206146 | -1.234652 | 1.551619  |
| C | -0.686294 | 2.654277  | 0.572777  | H | 3.203080 | -1.660411 | 3.278487  |
| C | -1.551049 | 3.679311  | 0.245210  | W | 3.348534 | 2.209338  | 3.059820  |
| C | -2.899065 | 3.593237  | 0.599301  | C | 4.708376 | 3.687127  | 3.220048  |
| C | -3.392137 | 2.476489  | 1.275538  | O | 5.502862 | 4.520098  | 3.300719  |
| C | -2.536765 | 1.441937  | 1.602418  | C | 3.078648 | 2.138326  | 5.100852  |
| H | 0.362511  | 2.707946  | 0.318649  | O | 2.911769 | 2.093024  | 6.234531  |
| H | -1.184160 | 4.552681  | -0.276743 | C | 1.836527 | 3.611276  | 2.959140  |
| H | -3.569888 | 4.404804  | 0.348348  | O | 1.025155 | 4.421627  | 2.934619  |
| H | -4.438506 | 2.423032  | 1.544078  | C | 3.479894 | 2.177244  | 1.002070  |
| H | -2.900878 | 0.569298  | 2.129839  | O | 3.522580 | 2.140948  | -0.142589 |
| H | -0.710082 | -0.410987 | 2.129727  | C | 4.880331 | 0.840879  | 3.214034  |
| P | 1.727577  | 0.197848  | 2.879833  | O | 5.736885 | 0.084323  | 3.305053  |

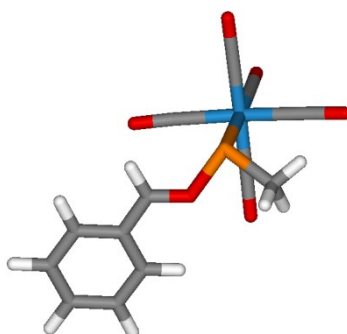

**7g:**

E = -1358.28797305667 au  
ZPE = 0.19072195 au

|   |           |           |           |   |          |           |          |
|---|-----------|-----------|-----------|---|----------|-----------|----------|
| C | -0.404971 | 1.120953  | 2.331176  | C | 2.698154 | -1.070902 | 1.772073 |
| O | 0.714528  | 0.678161  | 1.970335  | H | 2.001630 | -1.835351 | 1.424771 |
| C | -1.258073 | 1.827552  | 1.431203  | H | 3.049721 | -0.478197 | 0.927321 |
| C | -0.860830 | 2.106667  | 0.110268  | H | 3.557410 | -1.575436 | 2.221265 |
| C | -1.717700 | 2.792698  | -0.726291 | W | 3.464045 | 2.018471  | 3.506898 |
| C | -2.968060 | 3.206626  | -0.258572 | C | 4.621224 | 3.640468  | 3.843097 |
| C | -3.366413 | 2.936927  | 1.048653  | O | 5.272497 | 4.575746  | 4.025319 |
| C | -2.514552 | 2.250192  | 1.896464  | C | 3.584284 | 1.446282  | 5.483167 |
| H | 0.112834  | 1.786446  | -0.233971 | O | 3.638322 | 1.110793  | 6.578802 |
| H | -1.420688 | 3.013750  | -1.742603 | C | 1.740149 | 3.055524  | 3.892974 |
| H | -3.633043 | 3.746819  | -0.920128 | O | 0.733914 | 3.583589  | 4.072395 |
| H | -4.335244 | 3.264331  | 1.400534  | C | 3.249206 | 2.440578  | 1.504846 |
| H | -2.807869 | 2.034890  | 2.916086  | O | 3.099654 | 2.636654  | 0.383749 |
| H | -0.724469 | 0.965103  | 3.363148  | C | 5.099598 | 0.839828  | 3.066997 |
| P | 1.943311  | -0.055892 | 3.111950  | O | 5.989821 | 0.164089  | 2.809776 |

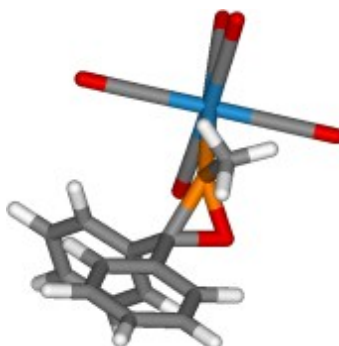

**3h:**

E = -1588.95595747058 au  
ZPE = 0.27180954 au

|   |           |           |           |   |           |           |           |
|---|-----------|-----------|-----------|---|-----------|-----------|-----------|
| C | 0.149013  | 0.009682  | 1.198413  | H | -0.454274 | -4.389903 | -0.190052 |
| O | 1.512804  | -0.095634 | 0.659893  | H | -2.695691 | -4.536922 | 0.859258  |
| C | -0.553752 | 1.268027  | 0.792712  | H | -3.617678 | -2.573070 | 2.060253  |
| C | -0.484226 | 1.697728  | -0.530943 | H | -2.322049 | -0.489449 | 2.203531  |
| C | -1.140105 | 2.857638  | -0.922728 | P | 1.570484  | 0.174200  | 2.302746  |
| C | -1.871158 | 3.595283  | 0.003952  | C | 1.911435  | -1.427673 | 3.077165  |
| C | -1.942771 | 3.168906  | 1.325661  | H | 1.352670  | -2.236307 | 2.612194  |
| C | -1.283709 | 2.009814  | 1.718421  | H | 2.981909  | -1.625398 | 3.001357  |
| H | 0.097183  | 1.131452  | -1.246965 | H | 1.648955  | -1.353142 | 4.133815  |
| H | -1.074936 | 3.190171  | -1.950909 | W | 2.638172  | 2.226820  | 3.219264  |
| H | -2.375899 | 4.502870  | -0.301561 | C | 3.612146  | 3.860087  | 3.942300  |
| H | -2.500710 | 3.743157  | 2.054214  | O | 4.173035  | 4.777473  | 4.344077  |
| H | -1.326633 | 1.688565  | 2.750521  | C | 3.293566  | 1.130554  | 4.832769  |
| C | -0.638438 | -1.257155 | 1.103162  | O | 3.653272  | 0.529004  | 5.739130  |
| C | -0.123986 | -2.364852 | 0.429877  | C | 0.941209  | 2.732401  | 4.284220  |
| C | -0.864128 | -3.539440 | 0.340078  | O | 0.008020  | 3.012452  | 4.884712  |
| C | -2.121203 | -3.621954 | 0.927005  | C | 1.963260  | 3.366678  | 1.624516  |
| C | -2.639013 | -2.518382 | 1.600596  | O | 1.617773  | 4.039073  | 0.768928  |
| C | -1.905904 | -1.342404 | 1.684785  | C | 4.326081  | 1.704945  | 2.143331  |
| H | 0.854640  | -2.302059 | -0.024203 | O | 5.260300  | 1.416369  | 1.549647  |

**TS(3h-6h):**

E = -1588.91207118021 au  
ZPE = 0.2711822 au  
 $\nu = -67.57 \text{ cm}^{-1}$

|   |           |           |           |   |           |          |           |
|---|-----------|-----------|-----------|---|-----------|----------|-----------|
| C | -0.069926 | 0.024261  | 1.446897  | C | -1.787065 | 2.573831 | -0.680991 |
| O | 2.121738  | -0.235571 | 0.792217  | C | -2.036664 | 3.572274 | 0.259805  |
| C | -0.731002 | 1.236414  | 1.035597  | C | -1.650599 | 3.404164 | 1.587664  |
| C | -1.165228 | 1.400659  | -0.293863 | C | -0.974940 | 2.259059 | 1.968083  |



|   |           |           |           |   |          |           |          |
|---|-----------|-----------|-----------|---|----------|-----------|----------|
| H | -0.965610 | 0.620757  | -1.015622 | P | 1.620803 | 0.137613  | 2.206928 |
| H | -2.084208 | 2.712988  | -1.711821 | C | 1.685965 | -1.271568 | 3.366533 |
| H | -2.535107 | 4.483841  | -0.043666 | H | 1.244389 | -2.183882 | 2.972735 |
| H | -1.864993 | 4.172431  | 2.318423  | H | 2.735292 | -1.453834 | 3.604029 |
| H | -0.684153 | 2.111989  | 2.994222  | H | 1.171974 | -0.984990 | 4.286329 |
| C | -0.647597 | -1.236504 | 1.038477  | W | 2.723615 | 2.238688  | 3.157081 |
| C | 0.094551  | -2.401664 | 0.750404  | C | 3.823965 | 3.836470  | 3.740547 |
| C | -0.549148 | -3.586489 | 0.452794  | O | 4.458446 | 4.741758  | 4.062536 |
| C | -1.943280 | -3.655181 | 0.453305  | C | 3.374041 | 1.155568  | 4.779301 |
| C | -2.693348 | -2.518257 | 0.730438  | O | 3.736529 | 0.552583  | 5.685186 |
| C | -2.058297 | -1.316572 | 0.999181  | C | 1.189621 | 2.936425  | 4.331860 |
| H | 1.169043  | -2.331753 | 0.693982  | O | 0.370703 | 3.349670  | 5.023417 |
| H | 0.034886  | -4.463336 | 0.205944  | C | 2.042638 | 3.255062  | 1.490249 |
| H | -2.439050 | -4.590178 | 0.226368  | O | 1.689357 | 3.815913  | 0.556691 |
| H | -3.774350 | -2.563689 | 0.731263  | C | 4.359300 | 1.574396  | 2.073325 |
| H | -2.648226 | -0.441947 | 1.230368  | O | 5.285600 | 1.228205  | 1.498931 |

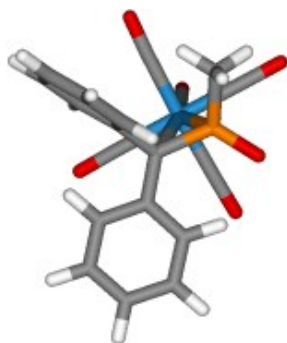

**6h:**  $E = -1588.96052318868$  au  
 $ZPE = 0.27317685$  au

|   |           |           |           |   |           |           |           |
|---|-----------|-----------|-----------|---|-----------|-----------|-----------|
| C | 0.090704  | 0.173992  | 2.014569  | H | 0.897980  | -4.116776 | 0.370220  |
| O | 1.498298  | -1.282263 | 4.019549  | H | -0.401823 | -3.682775 | -1.697436 |
| C | -0.982722 | 1.226142  | 2.001914  | H | -1.477846 | -1.468517 | -2.019053 |
| C | -0.952231 | 2.402843  | 1.256609  | H | -1.239719 | 0.277041  | -0.321546 |
| C | -2.024614 | 3.288508  | 1.276363  | P | 1.019041  | 0.027062  | 3.481381  |
| C | -3.152744 | 3.005490  | 2.036086  | C | 0.409990  | 1.147989  | 4.764025  |
| C | -3.205238 | 1.824838  | 2.771134  | H | -0.427093 | 0.672727  | 5.275916  |
| C | -2.131581 | 0.945805  | 2.752776  | H | 1.220681  | 1.299073  | 5.475892  |
| H | -0.090218 | 2.639862  | 0.653554  | H | 0.096198  | 2.102835  | 4.352479  |
| H | -1.973885 | 4.200144  | 0.695084  | W | 2.669365  | 1.263038  | 1.861061  |
| H | -3.985269 | 3.696912  | 2.054941  | C | 4.421673  | 2.078884  | 1.240528  |
| H | -4.080560 | 1.588510  | 3.362513  | O | 5.414801  | 2.535391  | 0.900576  |
| H | -2.180297 | 0.026609  | 3.322883  | C | 3.591242  | 1.205988  | 3.710639  |
| C | -0.017177 | -0.901512 | 1.005214  | O | 4.120093  | 1.185569  | 4.722150  |
| C | 0.571890  | -2.166484 | 1.178982  | C | 1.940571  | 3.131369  | 2.348666  |
| C | 0.433740  | -3.151358 | 0.213503  | O | 1.567963  | 4.167451  | 2.655776  |
| C | -0.297684 | -2.910122 | -0.946522 | C | 1.952978  | 1.354461  | -0.093117 |
| C | -0.899134 | -1.669416 | -1.126381 | O | 1.586017  | 1.377214  | -1.171566 |
| C | -0.761762 | -0.678755 | -0.164978 | C | 3.412623  | -0.629205 | 1.455435  |
| H | 1.132358  | -2.375018 | 2.077349  | O | 3.863055  | -1.653943 | 1.237976  |

**TS(3h-7h):**  $E = -1588.89608214184$  au  
 $ZPE = 0.27106839$  au  
 $\nu = -195.40$  cm<sup>-1</sup>

|   |           |           |          |   |           |           |          |
|---|-----------|-----------|----------|---|-----------|-----------|----------|
| C | -0.314025 | -0.058312 | 1.123981 | C | -2.306887 | 1.265451  | 1.892731 |
| O | 0.993440  | 0.018646  | 1.120360 | H | 0.377809  | 2.254101  | 0.059308 |
| C | -1.082505 | 1.180836  | 1.212329 | H | -0.834138 | 4.404332  | 0.172111 |
| C | -0.553496 | 2.327067  | 0.599308 | H | -2.976073 | 4.549462  | 1.404318 |
| C | -1.242313 | 3.527496  | 0.656485 | H | -3.904210 | 2.541546  | 2.517071 |
| C | -2.447922 | 3.606678  | 1.345241 | H | -2.695903 | 0.400892  | 2.411722 |
| C | -2.975675 | 2.474270  | 1.965697 | C | -0.912638 | -1.349327 | 0.864607 |

|   |           |           |           |   |          |           |           |
|---|-----------|-----------|-----------|---|----------|-----------|-----------|
| C | -0.114355 | -2.506201 | 0.959954  | H | 2.912899 | -1.401875 | 2.674268  |
| C | -0.653185 | -3.750818 | 0.695030  | H | 2.527433 | -0.925132 | 4.338007  |
| C | -1.989245 | -3.864348 | 0.313048  | W | 3.163653 | 2.382871  | 2.735879  |
| C | -2.782980 | -2.726660 | 0.182896  | C | 4.610046 | 3.790490  | 2.740242  |
| C | -2.253622 | -1.477591 | 0.452684  | O | 5.452132 | 4.579936  | 2.740045  |
| H | 0.922165  | -2.410123 | 1.241405  | C | 3.216773 | 2.232693  | 4.789040  |
| H | -0.036185 | -4.635215 | 0.780740  | O | 3.238985 | 2.129289  | 5.931960  |
| H | -2.408292 | -4.839960 | 0.102603  | C | 1.704930 | 3.836175  | 2.885219  |
| H | -3.811085 | -2.816265 | -0.141206 | O | 0.915023 | 4.662253  | 2.983379  |
| H | -2.863271 | -0.598788 | 0.310316  | C | 3.025684 | 2.409323  | 0.683655  |
| P | 1.366358  | 0.529986  | 2.860737  | O | 2.927683 | 2.393375  | -0.459405 |
| C | 2.109487  | -1.085230 | 3.339948  | C | 4.588014 | 0.904600  | 2.593285  |
| H | 1.358459  | -1.872051 | 3.416169  | O | 5.376696 | 0.075727  | 2.509974  |

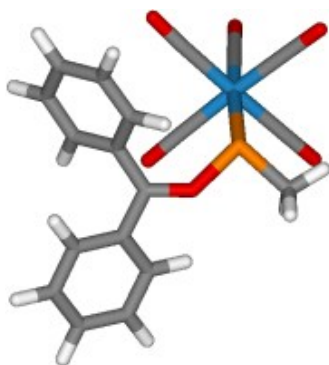

**7h:**  $E = -1588.91488494789$  au  
 $ZPE = 0.27213601$  au

|   |           |           |           |   |           |           |           |
|---|-----------|-----------|-----------|---|-----------|-----------|-----------|
| C | 0.038131  | 0.183175  | 0.189394  | H | 0.407011  | -4.311996 | -0.761098 |
| O | 1.299956  | 0.242992  | 0.350188  | H | -1.953983 | -4.744799 | -0.153701 |
| C | -0.798628 | 1.377552  | 0.107759  | H | -3.394080 | -2.889614 | 0.628998  |
| C | -0.571594 | 2.460255  | 0.968267  | H | -2.487191 | -0.607390 | 0.789175  |
| C | -1.406170 | 3.563612  | 0.927633  | P | 2.504334  | 1.554303  | 0.375952  |
| C | -2.441754 | 3.622289  | -0.000820 | C | 3.892106  | 0.362939  | 0.606503  |
| C | -2.656403 | 2.563690  | -0.878003 | H | 3.943000  | -0.400773 | -0.169409 |
| C | -1.853067 | 1.436487  | -0.813800 | H | 3.830125  | -0.112565 | 1.586165  |
| H | 0.244106  | 2.424810  | 1.676511  | H | 4.811182  | 0.953507  | 0.570949  |
| H | -1.238806 | 4.388165  | 1.607569  | W | 2.614973  | 2.488884  | -2.076046 |
| H | -3.075262 | 4.498513  | -0.047376 | C | 2.830835  | 3.225199  | -3.935413 |
| H | -3.450209 | 2.616456  | -1.611100 | O | 2.962506  | 3.631682  | -5.008657 |
| H | -2.017066 | 0.614212  | -1.495270 | C | 4.144270  | 1.172658  | -2.473092 |
| C | -0.521346 | -1.158294 | 0.093547  | O | 4.993986  | 0.442614  | -2.721778 |
| C | 0.295992  | -2.221224 | -0.325257 | C | 1.256399  | 1.076213  | -2.678606 |
| C | -0.221504 | -3.500341 | -0.419168 | O | 0.492543  | 0.266540  | -2.964391 |
| C | -1.552738 | -3.742155 | -0.080849 | C | 1.089820  | 3.845829  | -1.770350 |
| C | -2.365832 | -2.698873 | 0.351763  | O | 0.264953  | 4.638048  | -1.679557 |
| C | -1.858746 | -1.411237 | 0.434077  | C | 3.970892  | 3.838771  | -1.302245 |
| H | 1.323343  | -2.025434 | -0.597364 | O | 4.726756  | 4.579218  | -0.858892 |

**TS(7h-8h):**  $E = -1588.89251812705$  au  
 $ZPE = 0.27083095$  au  
 $\nu = -189.58$  cm<sup>-1</sup>

|   |           |          |           |   |           |           |           |
|---|-----------|----------|-----------|---|-----------|-----------|-----------|
| C | -0.067330 | 0.146468 | -0.269480 | H | -0.447562 | 4.432159  | -1.813917 |
| O | 1.218441  | 0.385197 | -0.088087 | H | -2.738455 | 4.619675  | -0.953692 |
| C | -0.878892 | 1.222014 | -0.664228 | H | -3.866595 | 2.671401  | 0.095068  |
| C | -0.212854 | 2.363399 | -1.234876 | H | -2.693769 | 0.527297  | 0.296559  |
| C | -0.922749 | 3.583551 | -1.340001 | C | -0.510432 | -1.193111 | 0.078263  |
| C | -2.205261 | 3.680909 | -0.867784 | C | 0.213896  | -1.952273 | 1.010829  |
| C | -2.861441 | 2.564126 | -0.289678 | C | -0.204363 | -3.228380 | 1.346900  |
| C | -2.217200 | 1.361048 | -0.198600 | C | -1.336916 | -3.774260 | 0.745369  |
| H | 0.587371  | 2.183794 | -1.937947 | C | -2.049876 | -3.037663 | -0.196877 |

|   |           |           |           |   |           |           |          |
|---|-----------|-----------|-----------|---|-----------|-----------|----------|
| C | -1.640470 | -1.756968 | -0.533237 | W | 2.686805  | 2.018819  | 2.591771 |
| H | 1.091503  | -1.526277 | 1.473567  | C | 3.393802  | 1.898365  | 4.493460 |
| H | 0.351530  | -3.801930 | 2.076980  | O | 3.818456  | 1.801430  | 5.559396 |
| H | -1.657406 | -4.775112 | 1.004514  | C | 3.425945  | 0.147753  | 2.148145 |
| H | -2.918216 | -3.467929 | -0.678254 | O | 3.825304  | -0.888161 | 1.861657 |
| H | -2.174986 | -1.200054 | -1.290013 | C | 0.871057  | 1.214799  | 3.146564 |
| P | 1.827051  | 2.021045  | 0.213279  | O | -0.148418 | 0.778927  | 3.442264 |
| C | 3.121671  | 2.019044  | -1.079572 | C | 1.908805  | 3.907842  | 2.908602 |
| H | 3.854826  | 1.228484  | -0.916585 | O | 1.469751  | 4.953848  | 3.073359 |
| H | 2.693237  | 1.908835  | -2.077626 | C | 4.436987  | 2.871274  | 1.920085 |
| H | 3.631440  | 2.982477  | -1.018147 | O | 5.398152  | 3.352057  | 1.519762 |

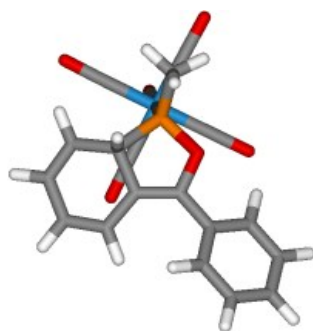

**8h:**  $E = -1588.95153936872$  au  
 $ZPE = 0.27220645$  au

|   |           |           |           |   |           |           |           |
|---|-----------|-----------|-----------|---|-----------|-----------|-----------|
| C | -0.185863 | 0.778738  | 0.274403  | H | -0.431457 | -3.307939 | -1.859093 |
| O | 1.199999  | 0.651149  | 0.339383  | H | -2.729768 | -3.732556 | -1.032272 |
| C | -0.645151 | 2.030856  | 0.525098  | H | -3.833753 | -2.066509 | 0.434410  |
| C | 0.458820  | 2.975491  | 0.998724  | H | -2.656658 | -0.007877 | 1.071220  |
| C | 0.208605  | 4.415868  | 0.691196  | P | 1.936382  | 2.159088  | 0.238123  |
| C | -1.016635 | 4.836632  | 0.351822  | C | 3.186523  | 2.036127  | 1.539049  |
| C | -2.127427 | 3.913765  | 0.195761  | H | 3.972277  | 1.349130  | 1.226370  |
| C | -1.951278 | 2.575737  | 0.271928  | H | 2.744153  | 1.695272  | 2.474521  |
| H | 0.579681  | 2.860210  | 2.087462  | H | 3.628097  | 3.025188  | 1.676127  |
| H | 1.021800  | 5.117935  | 0.818477  | W | 2.619878  | 2.874748  | -2.059771 |
| H | -1.195565 | 5.890152  | 0.175386  | C | 3.183293  | 3.477325  | -3.919682 |
| H | -3.101977 | 4.314494  | -0.050316 | O | 3.511569  | 3.825016  | -4.964171 |
| H | -2.774474 | 1.910751  | 0.053699  | C | 4.580440  | 2.493107  | -1.568595 |
| C | -0.888264 | -0.448965 | -0.077510 | O | 5.669993  | 2.268906  | -1.291567 |
| C | -0.263062 | -1.408832 | -0.885654 | C | 2.424507  | 0.927116  | -2.720006 |
| C | -0.925149 | -2.578899 | -1.229249 | O | 2.319342  | -0.152022 | -3.086794 |
| C | -2.216341 | -2.817406 | -0.766605 | C | 0.627796  | 3.205364  | -2.524627 |
| C | -2.838309 | -1.879189 | 0.052357  | O | -0.464379 | 3.376083  | -2.818800 |
| C | -2.180332 | -0.708233 | 0.400005  | C | 2.830805  | 4.817465  | -1.400934 |
| H | 0.739818  | -1.229123 | -1.244387 | O | 2.969924  | 5.900514  | -1.052705 |

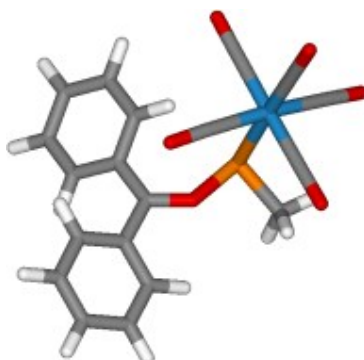

**7h':**  $E = -1588.91269593453$  au  
 $ZPE = 0.27217059$  au

|   |           |           |           |   |           |           |           |
|---|-----------|-----------|-----------|---|-----------|-----------|-----------|
| C | -0.084541 | 0.229016  | -0.114998 | H | -4.536506 | -0.916563 | -0.492181 |
| O | -0.237689 | 0.381362  | 1.142667  | H | -4.640682 | -0.168265 | -2.850329 |
| C | 1.224227  | 0.135461  | -0.738750 | H | -2.631779 | 0.784214  | -3.939009 |
| C | 2.332948  | 0.813596  | -0.211865 | H | -0.520305 | 0.966829  | -2.687381 |
| C | 3.586678  | 0.661959  | -0.781816 | P | 0.885221  | 0.434059  | 2.533692  |
| C | 3.757071  | -0.188840 | -1.868389 | C | -0.360857 | -0.299696 | 3.676394  |
| C | 2.666885  | -0.881258 | -2.393965 | H | -1.311610 | 0.232728  | 3.674762  |
| C | 1.407892  | -0.715539 | -1.844819 | H | -0.528952 | -1.350851 | 3.437521  |
| H | 2.202566  | 1.500479  | 0.606634  | H | 0.065891  | -0.240951 | 4.680936  |
| H | 4.428647  | 1.206446  | -0.375929 | W | 1.027342  | 3.003368  | 3.073894  |
| H | 4.738700  | -0.315720 | -2.306372 | C | 1.147643  | 4.953835  | 3.563128  |
| H | 2.802794  | -1.553517 | -3.230586 | O | 1.205073  | 6.071924  | 3.844618  |
| H | 0.571665  | -1.271999 | -2.241845 | C | 1.719344  | 2.377908  | 4.911019  |
| C | -1.322865 | 0.108780  | -0.879603 | O | 2.095521  | 1.990778  | 5.923704  |
| C | -2.474648 | -0.397324 | -0.258120 | C | -0.904318 | 2.950619  | 3.786740  |
| C | -3.656407 | -0.506363 | -0.969582 | O | -1.978805 | 2.936329  | 4.187286  |
| C | -3.713038 | -0.087724 | -2.298400 | C | 0.297298  | 3.367470  | 1.188517  |
| C | -2.582704 | 0.440401  | -2.914359 | O | -0.119548 | 3.481730  | 0.123963  |
| C | -1.389972 | 0.534614  | -2.213759 | C | 2.960395  | 3.090445  | 2.378656  |
| H | -2.424068 | -0.718377 | 0.772744  | O | 4.039660  | 3.165307  | 1.990954  |

**TS(7h'-8h')**:

$E = -1588.89763715872$  au

$ZPE = 0.27067203$  au

$\nu = -227.45$  cm<sup>-1</sup>

|   |           |           |           |   |           |           |           |
|---|-----------|-----------|-----------|---|-----------|-----------|-----------|
| C | -0.474445 | 1.015040  | 0.174848  | H | -1.811834 | -3.400929 | 0.012957  |
| O | 0.749169  | 0.645074  | -0.184528 | H | -3.698492 | -2.996546 | 1.565370  |
| C | -0.806383 | 2.365767  | 0.037092  | H | -4.071402 | -0.729604 | 2.493157  |
| C | 0.289393  | 3.297696  | -0.077741 | H | -2.570801 | 1.121100  | 1.869980  |
| C | 0.028931  | 4.598892  | -0.593482 | P | 1.884960  | 1.697548  | -0.946165 |
| C | -1.234249 | 4.949735  | -0.974512 | C | 2.031448  | 0.747859  | -2.506652 |
| C | -2.321076 | 4.040281  | -0.843494 | H | 2.336192  | -0.280909 | -2.300487 |
| C | -2.116303 | 2.787544  | -0.342070 | H | 1.084956  | 0.744574  | -3.048910 |
| H | 1.080264  | 3.227220  | 0.657188  | H | 2.795425  | 1.224977  | -3.122990 |
| H | 0.838391  | 5.314984  | -0.644828 | W | 3.976688  | 1.724145  | 0.507516  |
| H | -1.423497 | 5.945269  | -1.356493 | C | 5.619069  | 1.658234  | 1.688831  |
| H | -3.309753 | 4.339304  | -1.164842 | O | 6.547758  | 1.603655  | 2.368129  |
| H | -2.930954 | 2.078764  | -0.303431 | C | 5.121159  | 1.817072  | -1.204067 |
| C | -1.360850 | -0.076719 | 0.550904  | O | 5.740314  | 1.863159  | -2.168147 |
| C | -1.139562 | -1.369840 | 0.053071  | C | 3.943094  | -0.333091 | 0.362515  |
| C | -1.982585 | -2.409104 | 0.411106  | O | 3.902177  | -1.473678 | 0.264137  |
| C | -3.046085 | -2.180585 | 1.282299  | C | 2.712445  | 1.617841  | 2.129923  |
| C | -3.259802 | -0.905852 | 1.799334  | O | 1.967321  | 1.550550  | 2.999098  |
| C | -2.423094 | 0.140119  | 1.440188  | C | 3.935975  | 3.784670  | 0.585352  |
| H | -0.311455 | -1.545441 | -0.618947 | O | 3.907995  | 4.930763  | 0.621409  |

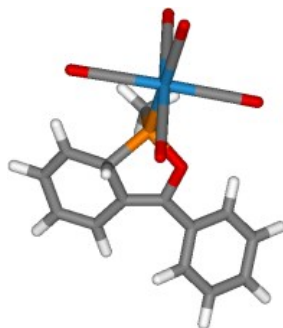

**8h'**:

$E = -1588.95183336101$  au

$ZPE = 0.27201207$  au

|   |           |          |          |   |           |          |           |
|---|-----------|----------|----------|---|-----------|----------|-----------|
| C | -0.290672 | 0.910755 | 0.299594 | C | 0.218787  | 3.251657 | 0.224023  |
| O | 1.102803  | 0.900418 | 0.421295 | C | -0.091477 | 4.471429 | -0.583828 |
| C | -0.823841 | 2.143110 | 0.119304 | C | -1.331514 | 4.677677 | -1.046363 |

|   |           |           |           |   |           |           |           |
|---|-----------|-----------|-----------|---|-----------|-----------|-----------|
| C | -2.396541 | 3.707562  | -0.845570 | H | -2.732436 | 0.214565  | 1.275026  |
| C | -2.156531 | 2.496259  | -0.296730 | P | 1.776598  | 2.325212  | -0.136572 |
| H | 0.321179  | 3.547765  | 1.280471  | C | 1.749038  | 2.086728  | -1.938886 |
| H | 0.687258  | 5.209972  | -0.726384 | H | 2.471418  | 1.312404  | -2.196883 |
| H | -1.561127 | 5.586048  | -1.589722 | H | 0.756809  | 1.797282  | -2.284213 |
| H | -3.389243 | 3.949666  | -1.201967 | H | 2.046294  | 3.016517  | -2.425214 |
| H | -2.947225 | 1.761806  | -0.244374 | W | 3.943653  | 2.951132  | 0.919643  |
| C | -0.906175 | -0.410498 | 0.318134  | C | 5.728911  | 3.459461  | 1.763196  |
| C | -0.203273 | -1.512092 | -0.189912 | O | 6.736157  | 3.745806  | 2.233658  |
| C | -0.792755 | -2.767630 | -0.226805 | C | 4.832633  | 2.902057  | -0.940022 |
| C | -2.086370 | -2.949980 | 0.254072  | O | 5.319330  | 2.873832  | -1.976250 |
| C | -2.781496 | -1.868179 | 0.787423  | C | 4.350311  | 0.938101  | 1.177710  |
| C | -2.197030 | -0.609921 | 0.825397  | O | 4.565449  | -0.175893 | 1.319154  |
| H | 0.801742  | -1.372649 | -0.563004 | C | 3.009749  | 2.983390  | 2.762001  |
| H | -0.241578 | -3.606266 | -0.633062 | O | 2.490184  | 3.000453  | 3.781925  |
| H | -2.544735 | -3.930137 | 0.224568  | C | 3.481638  | 4.941734  | 0.649630  |
| H | -3.778473 | -2.006812 | 1.185922  | O | 3.218554  | 6.046349  | 0.495761  |

**TS(8h'-4h):**

**E = -1588.85225908241 au**

**ZPE = 0.26632047 au**

**$\nu = -1282.36 \text{ cm}^{-1}$**

|   |           |           |           |   |           |           |           |
|---|-----------|-----------|-----------|---|-----------|-----------|-----------|
| C | -0.265695 | 0.812373  | -0.035671 | H | 0.101184  | -3.762309 | 0.034940  |
| O | 1.137989  | 0.865664  | 0.017857  | H | -2.329750 | -4.085168 | 0.428219  |
| C | -0.810649 | 2.112777  | -0.042072 | H | -3.802282 | -2.094638 | 0.627449  |
| C | 0.269514  | 3.177890  | -0.139085 | H | -2.891500 | 0.146753  | 0.440337  |
| C | -0.069441 | 4.537701  | -0.150038 | P | 1.809706  | 2.312333  | -0.433136 |
| C | -1.382893 | 4.936070  | -0.136873 | C | 1.873166  | 2.188196  | -2.251005 |
| C | -2.419487 | 3.953097  | -0.178992 | H | 2.612205  | 1.436317  | -2.531889 |
| C | -2.183107 | 2.615845  | -0.164313 | H | 0.897788  | 1.914678  | -2.655699 |
| H | -0.376062 | 2.506924  | 1.012990  | H | 2.183186  | 3.154178  | -2.653583 |
| H | 0.725714  | 5.271758  | -0.195219 | W | 3.887929  | 2.976946  | 0.771325  |
| H | -1.638303 | 5.985814  | -0.133081 | C | 5.559743  | 3.530530  | 1.800184  |
| H | -3.445876 | 4.291048  | -0.253522 | O | 6.499966  | 3.837701  | 2.383264  |
| H | -3.002558 | 1.922989  | -0.263038 | C | 5.032310  | 2.321782  | -0.814439 |
| C | -0.845105 | -0.485554 | 0.091826  | O | 5.658518  | 1.962403  | -1.703432 |
| C | -0.021926 | -1.631498 | -0.005937 | C | 3.959894  | 1.083030  | 1.609612  |
| C | -0.554383 | -2.903865 | 0.115358  | O | 3.986938  | 0.034060  | 2.062135  |
| C | -1.917770 | -3.088761 | 0.336784  | C | 2.655133  | 3.629017  | 2.290556  |
| C | -2.742312 | -1.970462 | 0.442825  | O | 1.938167  | 3.995135  | 3.104768  |
| C | -2.223853 | -0.691588 | 0.323751  | C | 3.765826  | 4.836219  | -0.102770 |
| H | 1.036219  | -1.504664 | -0.181939 | O | 3.687860  | 5.868368  | -0.596301 |

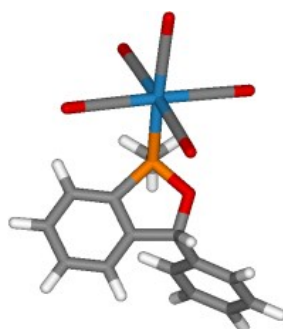

**4h:**

**E = -1588.99496853877 au**

**ZPE = 0.27341079 au**

|   |           |           |          |   |           |           |           |
|---|-----------|-----------|----------|---|-----------|-----------|-----------|
| C | -0.687975 | -0.027864 | 0.209032 | C | -1.722417 | 3.614710  | -0.332584 |
| O | 0.588335  | -0.371329 | 0.838928 | C | -1.827366 | 2.228444  | -0.301821 |
| C | -0.742555 | 1.477737  | 0.135210 | H | -1.455376 | -0.408093 | 0.885676  |
| C | 0.429752  | 2.113202  | 0.536835 | H | 1.451157  | 3.991318  | 0.819344  |
| C | 0.539926  | 3.499796  | 0.504532 | H | -0.475843 | 5.328471  | 0.032432  |
| C | -0.543784 | 4.248815  | 0.063458 | H | -2.563575 | 4.207790  | -0.667681 |

|   |           |           |           |   |           |           |           |
|---|-----------|-----------|-----------|---|-----------|-----------|-----------|
| H | -2.740527 | 1.741242  | -0.620366 | H | 3.482937  | -0.093017 | -0.121788 |
| C | -0.800934 | -0.738588 | -1.118142 | H | 2.318664  | 0.650835  | -1.250052 |
| C | -1.360455 | -2.014227 | -1.163307 | H | 3.429439  | 1.669028  | -0.299886 |
| C | -1.410956 | -2.720996 | -2.360180 | W | 2.580810  | 0.940201  | 3.395169  |
| C | -0.902484 | -2.153944 | -3.524176 | C | 3.334769  | 0.908236  | 5.284589  |
| C | -0.353413 | -0.875140 | -3.488716 | O | 3.762345  | 0.879317  | 6.351012  |
| C | -0.306765 | -0.170889 | -2.292143 | C | 4.385986  | 1.592196  | 2.647101  |
| H | -1.755484 | -2.456439 | -0.256305 | O | 5.382719  | 1.962716  | 2.219282  |
| H | -1.847213 | -3.711506 | -2.383870 | C | 3.143856  | -1.026155 | 3.109426  |
| H | -0.938913 | -2.702847 | -4.456607 | O | 3.449335  | -2.117549 | 2.945682  |
| H | 0.035697  | -0.425509 | -4.393502 | C | 0.728575  | 0.307503  | 4.054735  |
| H | 0.108698  | 0.828235  | -2.275271 | O | -0.306188 | -0.041187 | 4.397891  |
| P | 1.629410  | 0.873631  | 1.076011  | C | 1.984332  | 2.899475  | 3.643145  |
| C | 2.825404  | 0.759792  | -0.292454 | O | 1.648325  | 3.985757  | 3.782571  |

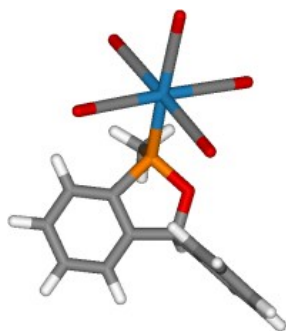

**4h':**

**E = -1588.99656487286 au**

**ZPE = 0.27388816 au**

|   |           |           |           |   |           |           |           |
|---|-----------|-----------|-----------|---|-----------|-----------|-----------|
| C | 0.165598  | -0.081049 | 0.097769  | H | -1.735797 | -3.919445 | 1.929300  |
| O | 1.615604  | 0.009805  | 0.254340  | H | -1.781087 | -2.949956 | 4.208222  |
| C | -0.345385 | 1.338509  | 0.002556  | H | -0.933115 | -0.653263 | 4.588570  |
| C | 0.657909  | 2.300677  | -0.084560 | H | -0.060936 | 0.669543  | 2.699263  |
| C | 0.348150  | 3.653195  | -0.177318 | P | 2.268353  | 1.479369  | -0.069876 |
| C | -0.987871 | 4.035817  | -0.188320 | C | 2.714440  | 1.409239  | -1.835853 |
| C | -1.994879 | 3.073728  | -0.103681 | H | 3.592375  | 0.775893  | -1.964623 |
| C | -1.680271 | 1.722079  | -0.007034 | H | 1.885321  | 1.022929  | -2.429192 |
| H | -0.028540 | -0.613265 | -0.837530 | H | 2.958770  | 2.418264  | -2.173182 |
| H | 1.130071  | 4.398905  | -0.237096 | W | 4.085498  | 2.151399  | 1.519093  |
| H | -1.248005 | 5.084147  | -0.255541 | C | 5.574988  | 2.636194  | 2.817819  |
| H | -3.032276 | 3.382535  | -0.104387 | O | 6.414713  | 2.907438  | 3.553890  |
| H | -2.465277 | 0.980496  | 0.072081  | C | 5.046364  | 3.155329  | -0.002739 |
| C | -0.393550 | -0.877423 | 1.245961  | O | 5.574917  | 3.710780  | -0.854769 |
| C | -0.866644 | -2.169488 | 1.037652  | C | 5.048355  | 0.403210  | 0.987784  |
| C | -1.368384 | -2.915616 | 2.100588  | O | 5.571949  | -0.569437 | 0.686069  |
| C | -1.392967 | -2.371393 | 3.379412  | C | 3.085663  | 1.138857  | 3.017762  |
| C | -0.917376 | -1.079075 | 3.593464  | O | 2.535213  | 0.583268  | 3.852582  |
| C | -0.424367 | -0.335584 | 2.530943  | C | 3.067364  | 3.871396  | 2.028276  |
| H | -0.841221 | -2.594045 | 0.041103  | O | 2.498160  | 4.822486  | 2.317799  |

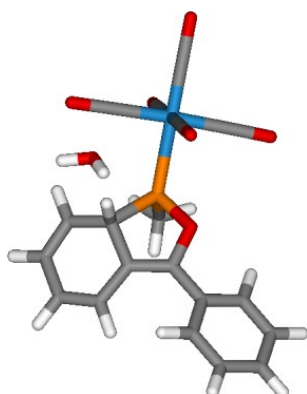

**8h'·H<sub>2</sub>O:**

**E = -1665.2996533887 au**  
**ZPE = 0.29482449 au**

|   |           |           |           |   |           |           |           |
|---|-----------|-----------|-----------|---|-----------|-----------|-----------|
| C | -0.357981 | 0.787315  | -0.116023 | H | -3.891638 | -2.067021 | 0.799431  |
| O | 1.032779  | 0.774606  | 0.039511  | H | -2.839853 | 0.152648  | 0.803267  |
| C | -0.875828 | 2.014506  | -0.365119 | P | 1.731459  | 2.171413  | -0.558561 |
| C | 0.172771  | 3.118277  | -0.280209 | C | 1.762557  | 1.849614  | -2.348704 |
| C | -0.107408 | 4.309246  | -1.137183 | H | 2.505815  | 1.078475  | -2.551376 |
| C | -1.334030 | 4.509734  | -1.637392 | H | 0.785447  | 1.526413  | -2.707520 |
| C | -2.410089 | 3.553072  | -1.429487 | H | 2.056655  | 2.761451  | -2.869826 |
| C | -2.193989 | 2.361267  | -0.829410 | W | 3.872257  | 2.805081  | 0.540373  |
| H | 0.260814  | 3.455043  | 0.765723  | C | 5.634250  | 3.309627  | 1.430387  |
| H | 0.681544  | 5.036236  | -1.285190 | O | 6.631231  | 3.592122  | 1.926487  |
| H | -1.544244 | 5.400463  | -2.216699 | C | 4.652493  | 3.287134  | -1.300883 |
| H | -3.391461 | 3.787135  | -1.821265 | O | 5.077619  | 3.551851  | -2.332377 |
| H | -2.992010 | 1.635047  | -0.772110 | C | 4.495609  | 0.852703  | 0.299545  |
| C | -0.981444 | -0.528261 | -0.048284 | O | 4.827698  | -0.234383 | 0.158231  |
| C | -0.265375 | -1.659428 | -0.465823 | C | 3.033807  | 2.291121  | 2.363808  |
| C | -0.858290 | -2.913867 | -0.452951 | O | 2.576130  | 1.983056  | 3.365105  |
| C | -2.169860 | -3.066030 | -0.012040 | C | 3.171988  | 4.738547  | 0.747456  |
| C | -2.879749 | -1.953606 | 0.431574  | O | 2.780760  | 5.810319  | 0.836592  |
| C | -2.291437 | -0.696640 | 0.420629  | O | 0.715980  | 4.431468  | 2.768868  |
| H | 0.753423  | -1.543803 | -0.808224 | H | 0.187048  | 3.934860  | 3.404968  |
| H | -0.295440 | -3.775508 | -0.789084 | H | 0.239739  | 5.261455  | 2.645023  |
| H | -2.630947 | -4.045306 | -0.002761 |   |           |           |           |

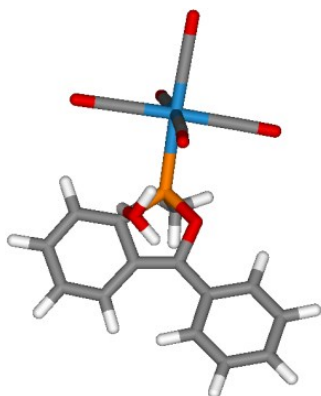

**TS(8h'·H<sub>2</sub>O→4h·H<sub>2</sub>O): E = -1665.233300426757 au**  
**ZPE = 0.29343369 au**  
 **$\nu = -377.86 \text{ cm}^{-1}$**

|   |           |           |           |   |           |           |           |
|---|-----------|-----------|-----------|---|-----------|-----------|-----------|
| C | -0.371262 | 0.877302  | -0.204752 | H | -2.586186 | -3.935388 | 0.558568  |
| O | 1.062471  | 0.885632  | -0.040035 | H | -4.014576 | -1.902507 | 0.468894  |
| C | -0.827946 | 2.130446  | -0.604062 | H | -3.028460 | 0.296980  | 0.151458  |
| C | 0.239436  | 3.135100  | -0.613953 | P | 1.772460  | 2.215051  | -0.705979 |
| C | -0.025485 | 4.479766  | -0.940827 | C | 1.958547  | 1.755792  | -2.464926 |
| C | -1.312722 | 4.890228  | -1.194139 | H | 2.739568  | 1.000711  | -2.565088 |
| C | -2.352357 | 3.923871  | -1.205068 | H | 1.015932  | 1.369181  | -2.853369 |
| C | -2.139078 | 2.597191  | -0.930610 | H | 2.248897  | 2.642365  | -3.031275 |
| H | 0.081666  | 3.126360  | 1.148556  | W | 3.888470  | 2.888988  | 0.475589  |
| H | 0.792858  | 5.188155  | -0.984771 | C | 5.622192  | 3.357815  | 1.445268  |
| H | -1.531211 | 5.926383  | -1.411933 | O | 6.592340  | 3.615400  | 2.001768  |
| H | -3.357143 | 4.244127  | -1.454459 | C | 4.712131  | 3.373446  | -1.373104 |
| H | -2.965748 | 1.905592  | -0.992879 | O | 5.142435  | 3.644202  | -2.395934 |
| C | -0.986252 | -0.408153 | -0.010018 | C | 4.485276  | 0.917832  | 0.265411  |
| C | -0.191880 | -1.573320 | 0.062371  | O | 4.797906  | -0.175946 | 0.149440  |
| C | -0.764545 | -2.820139 | 0.264840  | C | 2.928013  | 2.432712  | 2.199195  |
| C | -2.143162 | -2.960354 | 0.403037  | O | 2.288501  | 2.196066  | 3.135708  |
| C | -2.941286 | -1.818941 | 0.346665  | C | 3.236898  | 4.834720  | 0.676587  |
| C | -2.380840 | -0.566680 | 0.150656  | O | 2.867021  | 5.911060  | 0.805446  |
| H | 0.879178  | -1.483870 | -0.046799 | O | -0.249305 | 2.657969  | 2.040074  |
| H | -0.125350 | -3.693892 | 0.311630  | H | -0.567139 | 1.794190  | 1.641779  |

H 0.507116 2.479290 2.644234

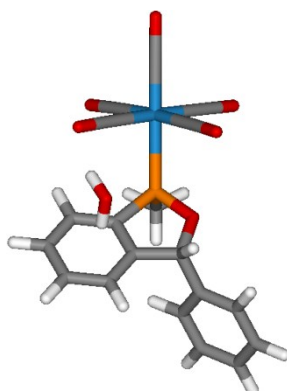

**4h·H<sub>2</sub>O:**

**E = -1665.34348979905 au**

**ZPE = 0.29676346 au**

|   |           |           |           |   |           |           |           |
|---|-----------|-----------|-----------|---|-----------|-----------|-----------|
| C | -0.107989 | -0.393500 | -0.308487 | H | 0.517016  | 0.204821  | -4.900740 |
| O | 1.253520  | -0.426135 | 0.227722  | H | 0.451961  | 1.031860  | -2.583234 |
| C | -0.620896 | 1.010208  | -0.102301 | P | 1.860088  | 1.006590  | 0.745571  |
| C | 0.313236  | 1.888961  | 0.438368  | C | 2.981496  | 1.551888  | -0.580362 |
| C | -0.019834 | 3.212727  | 0.707163  | H | 3.868904  | 0.918315  | -0.580142 |
| C | -1.306040 | 3.653432  | 0.422709  | H | 2.495341  | 1.505514  | -1.553347 |
| C | -2.244427 | 2.776065  | -0.123956 | H | 3.288093  | 2.578845  | -0.373824 |
| C | -1.907430 | 1.452264  | -0.391939 | W | 2.809770  | 1.031991  | 3.065414  |
| H | -0.678076 | -1.097382 | 0.300456  | C | 3.605080  | 1.045214  | 4.941684  |
| H | 0.705247  | 3.889052  | 1.141668  | O | 4.058259  | 1.050951  | 5.996806  |
| H | -1.584053 | 4.677937  | 0.631607  | C | 4.439972  | -0.029507 | 2.354885  |
| H | -3.246500 | 3.125631  | -0.335167 | O | 5.339454  | -0.613859 | 1.956555  |
| H | -2.638183 | 0.776247  | -0.817848 | C | 1.788772  | -0.730144 | 3.435659  |
| C | -0.113259 | -0.865494 | -1.741175 | O | 1.195456  | -1.689009 | 3.622128  |
| C | -0.435254 | -2.190276 | -2.026285 | C | 1.161696  | 2.058249  | 3.719455  |
| C | -0.412442 | -2.656333 | -3.337118 | O | 0.221752  | 2.619045  | 4.069143  |
| C | -0.063905 | -1.797190 | -4.373384 | C | 3.732076  | 2.813268  | 2.604539  |
| C | 0.253415  | -0.469718 | -4.096027 | O | 4.221035  | 3.812704  | 2.327689  |
| C | 0.223837  | -0.006320 | -2.787590 | O | -2.205866 | 0.994966  | 2.981904  |
| H | -0.706076 | -2.859325 | -1.218268 | H | -2.228100 | 1.250243  | 2.050813  |
| H | -0.667989 | -3.687044 | -3.547493 | H | -1.614304 | 1.632278  | 3.400488  |
| H | -0.044930 | -2.156639 | -5.394377 |   |           |           |           |

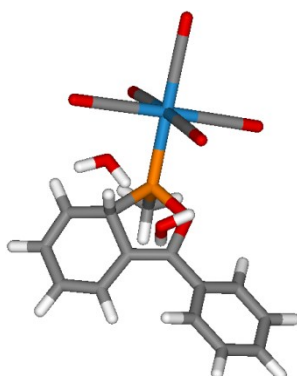

**8h'·2H<sub>2</sub>O:**

**E = -1741.65278397889 au**

**ZPE = 0.31988942 au**

|   |           |          |           |   |           |          |           |
|---|-----------|----------|-----------|---|-----------|----------|-----------|
| C | -0.285044 | 0.737114 | -0.127911 | C | -1.330559 | 4.477825 | -1.553219 |
| O | 1.109835  | 0.716381 | -0.054792 | C | -2.397996 | 3.528533 | -1.280197 |
| C | -0.813613 | 1.973031 | -0.322676 | C | -2.157801 | 2.332785 | -0.698439 |
| C | 0.241251  | 3.073089 | -0.289366 | H | 0.375529  | 3.419351 | 0.748747  |
| C | -0.077956 | 4.266394 | -1.128436 | H | 0.706253  | 4.989505 | -1.315473 |



|   |           |           |           |   |           |           |           |
|---|-----------|-----------|-----------|---|-----------|-----------|-----------|
| H | -1.569925 | 5.372479  | -2.114332 | H | 2.089849  | 2.778737  | -2.929578 |
| H | -3.400386 | 3.772394  | -1.607316 | W | 3.915630  | 2.739946  | 0.508648  |
| H | -2.957895 | 1.614855  | -0.592264 | C | 5.633026  | 3.217077  | 1.500700  |
| C | -0.910055 | -0.578278 | -0.036306 | O | 6.596227  | 3.482291  | 2.066493  |
| C | -0.219495 | -1.707292 | -0.499214 | C | 4.693287  | 3.413090  | -1.274732 |
| C | -0.810513 | -2.961587 | -0.454143 | O | 5.108803  | 3.777791  | -2.278891 |
| C | -2.092443 | -3.115586 | 0.066088  | C | 4.635032  | 0.853053  | 0.094130  |
| C | -2.775427 | -2.005293 | 0.553949  | O | 5.029103  | -0.195762 | -0.145113 |
| C | -2.190095 | -0.747925 | 0.508886  | C | 3.043566  | 1.998095  | 2.230097  |
| H | 0.777205  | -1.590429 | -0.900699 | O | 2.544553  | 1.541695  | 3.152792  |
| H | -0.268827 | -3.821919 | -0.826117 | C | 3.164745  | 4.634691  | 0.875448  |
| H | -2.551040 | -4.095307 | 0.102245  | O | 2.761043  | 5.690783  | 1.044928  |
| H | -3.762912 | -2.119558 | 0.982313  | O | 0.662911  | 4.069882  | 2.882684  |
| H | -2.720680 | 0.097590  | 0.924233  | H | 0.143404  | 3.262502  | 3.058400  |
| P | 1.793948  | 2.133900  | -0.630454 | H | 0.027773  | 4.794807  | 2.902259  |
| C | 1.794912  | 1.856913  | -2.426426 | O | -0.707919 | 1.597694  | 3.033364  |
| H | 2.528750  | 1.085043  | -2.658777 | H | -0.079126 | 0.956800  | 3.389754  |
| H | 0.809922  | 1.550793  | -2.779243 | H | -0.802572 | 1.370818  | 2.096312  |

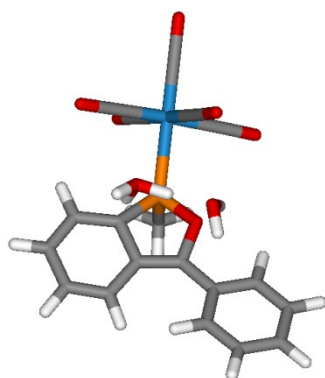

TS(8h'·2H<sub>2</sub>O→9h·2H<sub>2</sub>O): E = -1741.60418376191 au  
 ZPE = 0.31716859 au  
 ν = -282.22 cm<sup>-1</sup>

|   |           |           |           |   |           |           |           |
|---|-----------|-----------|-----------|---|-----------|-----------|-----------|
| C | -0.391649 | 0.805198  | -0.308336 | H | -3.057514 | 0.306195  | 0.125342  |
| O | 1.028492  | 0.802283  | -0.026217 | P | 1.774653  | 2.150886  | -0.644233 |
| C | -0.828519 | 2.075391  | -0.612792 | C | 1.969363  | 1.698814  | -2.406227 |
| C | 0.246648  | 3.080329  | -0.557787 | H | 2.742772  | 0.936285  | -2.506156 |
| C | 0.006247  | 4.420677  | -0.956734 | H | 1.026616  | 1.325143  | -2.805918 |
| C | -1.262909 | 4.836925  | -1.255984 | H | 2.275540  | 2.585122  | -2.963920 |
| C | -2.322762 | 3.881171  | -1.260847 | W | 3.910787  | 2.863000  | 0.477840  |
| C | -2.132025 | 2.560131  | -0.966114 | C | 5.691934  | 3.420339  | 1.287776  |
| H | 0.165205  | 3.273864  | 1.055916  | O | 6.704545  | 3.733766  | 1.731927  |
| H | 0.833112  | 5.120673  | -0.987230 | C | 4.534880  | 3.623774  | -1.334703 |
| H | -1.463708 | 5.868443  | -1.510569 | O | 4.888769  | 4.051468  | -2.336779 |
| H | -3.317821 | 4.212405  | -1.534194 | C | 4.655958  | 1.000544  | -0.011381 |
| H | -2.963971 | 1.877078  | -1.050715 | O | 5.052306  | -0.038382 | -0.284718 |
| C | -1.033123 | -0.449165 | -0.040173 | C | 3.304548  | 2.130647  | 2.307914  |
| C | -0.262569 | -1.628311 | 0.086424  | O | 2.987116  | 1.738727  | 3.335987  |
| C | -0.856577 | -2.849390 | 0.367749  | C | 3.076452  | 4.680494  | 0.975591  |
| C | -2.235079 | -2.951727 | 0.535446  | O | 2.602587  | 5.682666  | 1.266216  |
| C | -3.009826 | -1.797529 | 0.431674  | O | 0.091598  | 3.248951  | 2.149664  |
| C | -2.427836 | -0.569498 | 0.159198  | H | 0.033727  | 2.246651  | 2.449532  |
| H | 0.807911  | -1.572182 | -0.050481 | H | -0.695821 | 3.733211  | 2.443847  |
| H | -0.234621 | -3.732597 | 0.452024  | O | 0.160297  | 0.794891  | 2.694801  |
| H | -2.695545 | -3.907043 | 0.750903  | H | 0.688354  | 0.495482  | 1.929723  |
| H | -4.081963 | -1.851301 | 0.578479  | H | -0.682299 | 0.324293  | 2.616593  |

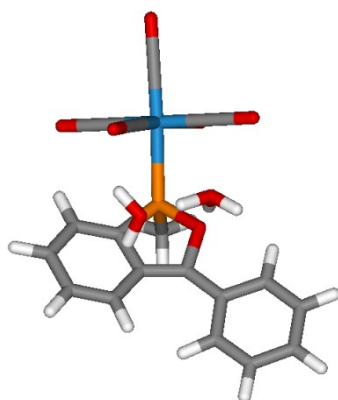

**9h·2H<sub>2</sub>O:**

**E = -1741.60944386617 au**

**ZPE = 0.31959698 au**

|   |           |           |           |   |           |          |           |
|---|-----------|-----------|-----------|---|-----------|----------|-----------|
| C | -0.355498 | 0.731838  | -0.422991 | H | -3.048856 | 0.215163 | -0.699158 |
| O | 1.078344  | 0.675315  | -0.107365 | P | 1.936312  | 1.928252 | -0.875990 |
| C | -0.703015 | 2.046656  | -0.794830 | C | 2.224704  | 1.211378 | -2.535601 |
| C | 0.435768  | 2.911441  | -1.017513 | H | 2.964723  | 0.400512 | -2.464661 |
| C | 0.310669  | 4.275464  | -1.258971 | H | 1.281496  | 0.831894 | -2.954113 |
| C | -0.958382 | 4.865874  | -1.314134 | H | 2.624720  | 2.009911 | -3.179736 |
| C | -2.086940 | 4.050349  | -1.112273 | W | 3.894018  | 2.867221 | 0.398211  |
| C | -1.986968 | 2.682527  | -0.857763 | C | 5.462799  | 3.713946 | 1.400357  |
| H | -0.316336 | 3.816495  | 2.109938  | O | 6.345302  | 4.199345 | 1.960400  |
| H | 1.204408  | 4.888590  | -1.401640 | C | 3.984983  | 4.378732 | -1.015446 |
| H | -1.068120 | 5.935144  | -1.502908 | O | 4.030787  | 5.214845 | -1.804098 |
| H | -3.083712 | 4.500478  | -1.137607 | C | 5.160533  | 1.702863 | -0.774236 |
| H | -2.899467 | 2.112648  | -0.692638 | O | 5.831635  | 1.045290 | -1.434271 |
| C | -1.086677 | -0.402840 | 0.037902  | C | 3.823618  | 1.329909 | 1.793586  |
| C | -0.430303 | -1.477032 | 0.715668  | O | 3.786778  | 0.475571 | 2.560574  |
| C | -1.144161 | -2.565338 | 1.219602  | C | 2.506621  | 3.930524 | 1.476465  |
| C | -2.532480 | -2.654155 | 1.068260  | O | 1.671533  | 4.492326 | 2.046082  |
| C | -3.191667 | -1.627888 | 0.373716  | O | -0.858720 | 3.007735 | 2.097495  |
| C | -2.497775 | -0.533849 | -0.132939 | H | -0.059641 | 1.894940 | 2.266202  |
| H | 0.656874  | -1.464838 | 0.810712  | H | -1.318093 | 3.006470 | 1.229690  |
| H | -0.598824 | -3.364059 | 1.731507  | O | 0.616898  | 1.050824 | 2.338992  |
| H | -3.086998 | -3.508175 | 1.463824  | H | 0.951982  | 0.861602 | 1.374772  |
| H | -4.272781 | -1.685354 | 0.215104  | H | 0.104184  | 0.260245 | 2.600179  |

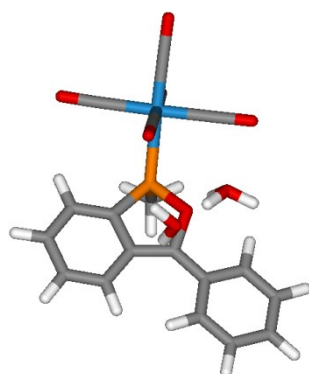

**TS(9h·2H<sub>2</sub>O→4h·2H<sub>2</sub>O):**

**E = -1741.60885729256 au**

**ZPE = 0.31942253 au**

**$\nu = -41.92 \text{ cm}^{-1}$**

|   |           |          |           |   |           |           |           |
|---|-----------|----------|-----------|---|-----------|-----------|-----------|
| C | -0.459074 | 1.000759 | -0.179749 | C | -1.989853 | 2.782102  | -1.211607 |
| O | 0.986522  | 0.918125 | 0.100159  | H | -0.764671 | 3.366395  | 2.550756  |
| C | -0.740504 | 2.217405 | -0.828837 | H | 1.252382  | 4.826365  | -1.892569 |
| C | 0.427110  | 3.001959 | -1.130523 | H | -0.966442 | 5.796787  | -2.445280 |
| C | 0.347569  | 4.267379 | -1.688365 | H | -3.010243 | 4.444723  | -2.051345 |
| C | -0.891944 | 4.809778 | -2.010148 | H | -2.910138 | 2.239464  | -1.061923 |
| C | -2.041628 | 4.041461 | -1.779661 | C | -1.178687 | -0.166100 | 0.194827  |

|   |           |           |           |   |           |           |           |
|---|-----------|-----------|-----------|---|-----------|-----------|-----------|
| C | -0.496786 | -1.347064 | 0.595945  | C | 5.459871  | 3.601899  | 1.522475  |
| C | -1.185210 | -2.485061 | 0.988001  | O | 6.359639  | 3.975324  | 2.130110  |
| C | -2.577213 | -2.516350 | 1.002135  | C | 3.807305  | 4.701516  | -0.581262 |
| C | -3.267019 | -1.367068 | 0.613591  | O | 3.801943  | 5.699122  | -1.142708 |
| C | -2.597484 | -0.219773 | 0.224690  | C | 5.105480  | 2.134491  | -0.998975 |
| H | 0.583208  | -1.375582 | 0.554787  | O | 5.775397  | 1.699580  | -1.818274 |
| H | -0.621422 | -3.365047 | 1.275609  | C | 3.977587  | 1.131744  | 1.485757  |
| H | -3.110365 | -3.407400 | 1.305871  | O | 4.048766  | 0.137956  | 2.050845  |
| H | -4.350778 | -1.361238 | 0.621100  | C | 2.513053  | 3.682333  | 1.804454  |
| H | -3.178952 | 0.649896  | -0.037411 | O | 1.722589  | 4.102758  | 2.522670  |
| P | 1.880799  | 2.023025  | -0.788763 | O | -0.972580 | 2.429076  | 2.431917  |
| C | 2.189176  | 1.076202  | -2.314325 | H | 0.127789  | 1.531212  | 2.680008  |
| H | 2.902328  | 0.275644  | -2.114723 | H | -1.128799 | 2.281498  | 1.474629  |
| H | 1.254544  | 0.660855  | -2.691988 | O | 0.947034  | 0.867593  | 2.580108  |
| H | 2.613877  | 1.753150  | -3.057685 | H | 1.088644  | 0.816486  | 1.536902  |
| W | 3.864449  | 2.915440  | 0.456985  | H | 0.707010  | -0.010028 | 2.920148  |

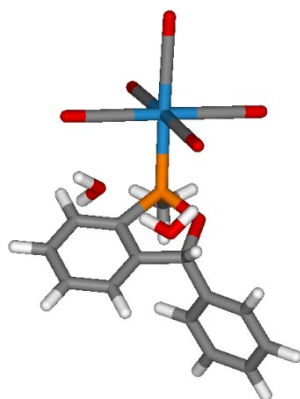

**4h·2H<sub>2</sub>O:**

**E = -1741.69683755688 au**

**ZPE = 0.32122412 au**

|   |           |           |           |   |           |           |           |
|---|-----------|-----------|-----------|---|-----------|-----------|-----------|
| C | -0.186405 | 0.582888  | 0.540044  | H | -0.828008 | -1.584191 | 1.998174  |
| O | 1.251113  | 0.460902  | 0.281004  | P | 1.928694  | 1.653700  | -0.615002 |
| C | -0.635222 | 1.867974  | -0.105492 | C | 2.194832  | 0.910033  | -2.254193 |
| C | 0.371594  | 2.559027  | -0.774013 | H | 3.019846  | 0.199457  | -2.197317 |
| C | 0.112008  | 3.776850  | -1.396910 | H | 1.294068  | 0.406652  | -2.603183 |
| C | -1.175603 | 4.298882  | -1.339916 | H | 2.466015  | 1.703634  | -2.953161 |
| C | -2.185745 | 3.607700  | -0.666146 | W | 3.895449  | 2.761237  | 0.486449  |
| C | -1.921877 | 2.390441  | -0.049580 | C | 5.465576  | 3.628517  | 1.447314  |
| H | -0.121638 | 4.568573  | 1.052724  | O | 6.347644  | 4.121568  | 1.995244  |
| H | 0.896477  | 4.315685  | -1.911966 | C | 4.833837  | 2.975143  | -1.333409 |
| H | -1.394403 | 5.245938  | -1.815569 | O | 5.351010  | 3.084257  | -2.350593 |
| H | -3.182169 | 4.027153  | -0.618840 | C | 4.753385  | 0.894626  | 0.688866  |
| H | -2.706030 | 1.860066  | 0.475166  | O | 5.233348  | -0.139645 | 0.795701  |
| C | -0.891550 | -0.660715 | 0.063402  | C | 2.893038  | 2.475934  | 2.266894  |
| C | -1.284199 | -0.811163 | -1.266634 | O | 2.337567  | 2.282805  | 3.248900  |
| C | -1.891555 | -1.985572 | -1.692218 | C | 3.028877  | 4.618140  | 0.258961  |
| C | -2.114360 | -3.022596 | -0.789667 | O | 2.562886  | 5.655784  | 0.124106  |
| C | -1.730609 | -2.877566 | 0.539264  | O | 0.135217  | 4.479310  | 1.979868  |
| C | -1.123557 | -1.699641 | 0.962199  | H | -0.507894 | 3.032237  | 2.908629  |
| H | -1.125213 | -0.004361 | -1.970785 | H | 0.010219  | 5.354399  | 2.366211  |
| H | -2.195185 | -2.091457 | -2.725991 | O | -0.785081 | 2.255053  | 3.431658  |
| H | -2.590280 | -3.936859 | -1.120859 | H | 0.026191  | 1.950453  | 3.853964  |
| H | -1.906436 | -3.677791 | 1.246899  | H | -0.290411 | 0.669154  | 1.622916  |

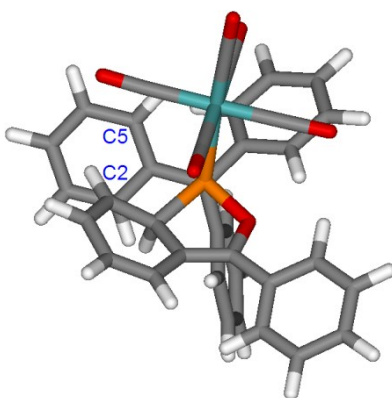

**8e:**  $E = -2281.33735249745$  au  
 $ZPE = 0.51842975$  au

|   |           |           |           |    |           |           |           |
|---|-----------|-----------|-----------|----|-----------|-----------|-----------|
| C | -0.486574 | 0.454021  | 0.476342  | H  | 4.033051  | -4.739873 | 1.281715  |
| O | -0.006009 | 0.570641  | 1.769323  | H  | 2.046112  | -3.647659 | 2.249891  |
| C | 0.360829  | -0.160587 | -0.404802 | C  | 1.975919  | -0.280620 | 4.569745  |
| C | 1.589829  | -0.770664 | 0.268290  | C  | 1.033741  | 0.719656  | 4.865358  |
| C | 2.819043  | -0.796365 | -0.588954 | C  | 1.107721  | 1.445824  | 6.054289  |
| C | 2.716137  | -0.656621 | -1.926770 | C  | 2.117245  | 1.169352  | 6.983044  |
| C | 1.436626  | -0.392870 | -2.573143 | C  | 3.040607  | 0.157351  | 6.712231  |
| C | 0.309356  | -0.153631 | -1.849377 | C  | 2.971688  | -0.560878 | 5.513663  |
| H | 1.367590  | -1.818552 | 0.551661  | H  | 0.224477  | 0.925692  | 4.161900  |
| H | 3.774889  | -1.024923 | -0.114522 | H  | 0.372612  | 2.229103  | 6.255100  |
| H | 3.609059  | -0.739096 | -2.552193 | H  | 2.179789  | 1.738170  | 7.913963  |
| H | 1.405482  | -0.324415 | -3.663123 | H  | 3.828113  | -0.074950 | 7.433420  |
| H | -0.608709 | 0.145450  | -2.355638 | H  | 3.702966  | -1.346389 | 5.321082  |
| C | -1.800067 | 1.065325  | 0.265317  | C  | 0.628821  | -2.052071 | 3.452757  |
| C | -2.192650 | 2.169600  | 1.048366  | C  | -0.400134 | -2.276452 | 2.526395  |
| C | -3.434871 | 2.771848  | 0.847291  | C  | -1.399290 | -3.226658 | 2.773317  |
| C | -4.310855 | 2.277058  | -0.125838 | C  | -1.389782 | -3.981564 | 3.946228  |
| C | -3.940112 | 1.165304  | -0.890973 | C  | -0.364346 | -3.776277 | 4.875666  |
| C | -2.699093 | 0.558885  | -0.694250 | C  | 0.624482  | -2.823545 | 4.630892  |
| H | -1.513069 | 2.554511  | 1.808423  | H  | -0.460017 | -1.726957 | 1.593421  |
| H | -3.722013 | 3.633377  | 1.455309  | H  | -2.189173 | -3.370771 | 2.031799  |
| H | -5.284374 | 2.748904  | -0.279868 | H  | -2.170849 | -4.721957 | 4.136398  |
| H | -4.627633 | 0.759287  | -1.637103 | H  | -0.333791 | -4.358013 | 5.800481  |
| H | -2.437091 | -0.331949 | -1.266649 | H  | 1.411650  | -2.679180 | 5.371605  |
| P | 1.665774  | 0.211966  | 1.856498  | Mo | 2.917638  | 2.402333  | 1.743365  |
| C | 1.815648  | -1.080397 | 3.267552  | C  | 3.759770  | 4.215430  | 1.511275  |
| C | 3.079878  | -1.828826 | 2.808851  | O  | 4.235203  | 5.257157  | 1.371727  |
| C | 4.331363  | -1.184434 | 2.799790  | C  | 1.278619  | 3.267335  | 2.627230  |
| C | 5.457048  | -1.800421 | 2.247206  | O  | 0.370612  | 3.758395  | 3.133206  |
| C | 5.358241  | -3.079434 | 1.693161  | C  | 2.090845  | 2.636830  | -0.131745 |
| C | 4.124810  | -3.737205 | 1.705986  | O  | 1.675412  | 2.846998  | -1.181849 |
| C | 2.998871  | -3.118552 | 2.256051  | C  | 4.578331  | 1.535784  | 0.896212  |
| H | 4.432965  | -0.191396 | 3.231196  | O  | 5.533192  | 1.093359  | 0.433727  |
| H | 6.412832  | -1.271676 | 2.247546  | C  | 3.792715  | 2.303383  | 3.601288  |
| H | 6.236814  | -3.561335 | 1.257583  | O  | 4.317780  | 2.326281  | 4.622699  |

**TS(8e-10e):**  $E = -2281.28945061759$  au  
 $ZPE = 0.51268952$  au  
 $\nu = -1075.64$  cm<sup>-1</sup>

|   |          |          |           |   |           |           |           |
|---|----------|----------|-----------|---|-----------|-----------|-----------|
| C | 0.000908 | 0.385580 | 0.243464  | H | 2.452067  | -1.065546 | 0.601015  |
| O | 0.175853 | 0.917451 | 1.516034  | H | 4.507959  | 0.952938  | 0.444370  |
| C | 1.187646 | 0.298627 | -0.469411 | H | 4.783282  | 0.752012  | -2.003770 |
| C | 2.370771 | 0.412381 | 0.399997  | H | 2.838300  | 0.166418  | -3.460830 |
| C | 3.655651 | 0.703225 | -0.189706 | H | 0.570975  | -0.039856 | -2.544920 |
| C | 3.806532 | 0.583333 | -1.544316 | C | -1.362187 | 0.029452  | -0.083626 |
| C | 2.682043 | 0.256129 | -2.382913 | C | -2.434466 | 0.572187  | 0.663301  |
| C | 1.415439 | 0.122715 | -1.873978 | C | -3.748497 | 0.198505  | 0.393192  |

|   |           |           |           |    |           |           |          |
|---|-----------|-----------|-----------|----|-----------|-----------|----------|
| C | -4.028680 | -0.730556 | -0.618941 | H  | 4.141907  | 0.498343  | 2.862992 |
| C | -2.975935 | -1.292177 | -1.348296 | H  | 6.338708  | -0.233458 | 3.662258 |
| C | -1.655167 | -0.928667 | -1.079913 | H  | 6.586493  | -2.416780 | 4.854902 |
| H | -2.218013 | 1.295878  | 1.450507  | H  | 4.571528  | -3.857929 | 5.205287 |
| H | -4.564200 | 0.635723  | 0.974749  | H  | 2.355420  | -3.118041 | 4.381842 |
| H | -5.060907 | -1.022643 | -0.827412 | C  | 0.726707  | -0.549266 | 4.242254 |
| H | -3.182139 | -2.035238 | -2.123138 | C  | -0.642569 | -0.270432 | 4.053938 |
| H | -0.844090 | -1.410907 | -1.623838 | C  | -1.462990 | 0.095140  | 5.122627 |
| P | 1.760909  | 0.865301  | 2.060979  | C  | -0.938688 | 0.217955  | 6.411446 |
| C | 1.664148  | -0.890767 | 3.079209  | C  | 0.420974  | -0.026419 | 6.613727 |
| C | 1.222576  | -1.907660 | 2.068925  | C  | 1.238019  | -0.404650 | 5.545332 |
| C | 2.218570  | -2.255615 | 1.061452  | H  | -1.075656 | -0.296582 | 3.059621 |
| C | 1.828550  | -3.126505 | -0.016855 | H  | -2.519229 | 0.304602  | 4.936698 |
| C | 0.533818  | -3.582604 | -0.128340 | H  | -1.579628 | 0.514133  | 7.245486 |
| C | -0.413927 | -3.266836 | 0.871606  | H  | 0.859333  | 0.081725  | 7.609066 |
| C | -0.067900 | -2.443276 | 1.940950  | H  | 2.294664  | -0.576650 | 5.737394 |
| H | 3.260288  | -2.354912 | 1.395733  | Mo | 2.307435  | 3.068628  | 3.137750 |
| H | 2.585321  | -3.420623 | -0.748226 | C  | 2.574485  | 4.936483  | 3.844218 |
| H | 0.246939  | -4.226019 | -0.964093 | O  | 2.711550  | 6.011850  | 4.237521 |
| H | -1.423685 | -3.677577 | 0.815694  | C  | 0.390167  | 3.073794  | 3.908627 |
| H | -0.820282 | -2.230743 | 2.696325  | O  | -0.673822 | 3.121110  | 4.332781 |
| C | 3.074823  | -1.250262 | 3.565972  | C  | 1.600324  | 3.824656  | 1.357838 |
| C | 4.212184  | -0.461809 | 3.370269  | O  | 1.208465  | 4.230410  | 0.358035 |
| C | 5.469531  | -0.874213 | 3.829439  | C  | 4.211808  | 3.077768  | 2.388806 |
| C | 5.607362  | -2.092434 | 4.494220  | O  | 5.289692  | 3.083649  | 1.984346 |
| C | 4.477937  | -2.898401 | 4.690603  | C  | 3.037326  | 2.299347  | 4.901578 |
| C | 3.230440  | -2.481787 | 4.229153  | O  | 3.480126  | 1.917359  | 5.890313 |

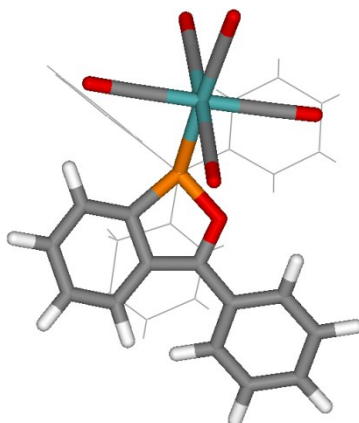

**10e:**

$E = -2281.30844748768$  au

$ZPE = 0.51859161$  au

|   |           |           |           |   |           |           |           |
|---|-----------|-----------|-----------|---|-----------|-----------|-----------|
| C | 0.081871  | 0.298242  | 0.326555  | H | -4.501526 | 0.513644  | 0.882357  |
| O | 0.186322  | 1.072072  | 1.459173  | H | -4.917396 | -1.244483 | -0.846400 |
| C | 1.311556  | 0.304643  | -0.411377 | H | -2.981292 | -2.290672 | -2.026492 |
| C | 2.394946  | 0.787589  | 0.388553  | H | -0.675309 | -1.610776 | -1.483986 |
| C | 3.685933  | 0.935120  | -0.144972 | P | 1.757656  | 1.103794  | 2.040550  |
| C | 3.912671  | 0.596510  | -1.473096 | C | 1.606802  | -0.776043 | 2.921132  |
| C | 2.852186  | 0.101392  | -2.268459 | C | 1.094886  | -1.730334 | 1.896902  |
| C | 1.572387  | -0.048788 | -1.757954 | C | 2.116665  | -2.311571 | 0.947887  |
| H | 2.747872  | -1.508470 | 0.528022  | C | 1.565604  | -3.182868 | -0.130665 |
| H | 4.504537  | 1.313749  | 0.468346  | C | 0.302056  | -3.662372 | -0.081954 |
| H | 4.907922  | 0.717292  | -1.906193 | C | -0.571176 | -3.286461 | 1.000842  |
| H | 3.041520  | -0.152560 | -3.314345 | C | -0.173496 | -2.362632 | 1.943615  |
| H | 0.771812  | -0.413709 | -2.400694 | H | 2.854915  | -2.908955 | 1.524817  |
| C | -1.254289 | -0.106794 | -0.027984 | H | 2.244341  | -3.472349 | -0.937646 |
| C | -2.363570 | 0.458973  | 0.650670  | H | -0.069283 | -4.335702 | -0.859173 |
| C | -3.661188 | 0.054253  | 0.355582  | H | -1.560635 | -3.740966 | 1.077691  |
| C | -3.896464 | -0.929230 | -0.617347 | H | -0.875467 | -2.101782 | 2.731222  |
| C | -2.812830 | -1.509873 | -1.280288 | C | 3.016564  | -1.178799 | 3.369063  |
| C | -1.505613 | -1.117857 | -0.983911 | C | 4.166283  | -0.406047 | 3.187546  |
| H | -2.187858 | 1.236541  | 1.394780  | C | 5.416701  | -0.841856 | 3.643222  |

|   |           |           |          |    |           |           |          |
|---|-----------|-----------|----------|----|-----------|-----------|----------|
| C | 5.537586  | -2.073053 | 4.287047 | H  | -2.511292 | 0.439138  | 4.907771 |
| C | 4.396895  | -2.866323 | 4.468460 | H  | -1.527621 | 0.532594  | 7.206548 |
| C | 3.156333  | -2.423497 | 4.012811 | H  | 0.907631  | 0.032915  | 7.505553 |
| H | 4.114335  | 0.563498  | 2.696505 | H  | 2.293204  | -0.580609 | 5.584506 |
| H | 6.293913  | -0.208094 | 3.491785 | Mo | 2.294287  | 3.203651  | 3.295340 |
| H | 6.511477  | -2.415731 | 4.644994 | C  | 2.626886  | 4.982481  | 4.180860 |
| H | 4.475361  | -3.834422 | 4.969406 | O  | 2.808056  | 6.006160  | 4.679368 |
| H | 2.270860  | -3.046659 | 4.161125 | C  | 0.402692  | 3.176790  | 4.129022 |
| C | 0.703870  | -0.451731 | 4.117443 | O  | -0.645047 | 3.224887  | 4.591194 |
| C | -0.661835 | -0.133634 | 3.968556 | C  | 1.534388  | 4.150601  | 1.632868 |
| C | -1.456618 | 0.200966  | 5.066036 | O  | 1.111425  | 4.672913  | 0.702151 |
| C | -0.908054 | 0.258085  | 6.349320 | C  | 4.174509  | 3.272310  | 2.492295 |
| C | 0.449160  | -0.023365 | 6.514946 | O  | 5.241462  | 3.315821  | 2.061653 |
| C | 1.238959  | -0.374396 | 5.416824 | C  | 3.088290  | 2.257537  | 4.942241 |
| H | -1.115653 | -0.118062 | 2.983641 | O  | 3.581221  | 1.784332  | 5.865458 |

**TS(10e-11e-12):**       $E = -2281.30469897761$  au  
                                  $ZPE = 0.51628019$  au  
                                  $v = -101.74$  cm<sup>-1</sup>

|   |           |           |           |    |           |           |          |
|---|-----------|-----------|-----------|----|-----------|-----------|----------|
| C | 0.065336  | 0.331578  | 0.269218  | H  | -1.679118 | -3.607134 | 1.036655 |
| O | 0.170741  | 1.008378  | 1.449884  | H  | -0.914911 | -2.096447 | 2.780324 |
| C | 1.308608  | 0.301263  | -0.426626 | C  | 3.059041  | -1.254375 | 3.402505 |
| C | 2.384937  | 0.767708  | 0.402408  | C  | 4.148171  | -0.387166 | 3.276029 |
| C | 3.697936  | 0.874146  | -0.101450 | C  | 5.430637  | -0.759270 | 3.696526 |
| C | 3.947837  | 0.525796  | -1.417874 | C  | 5.647777  | -2.019200 | 4.254955 |
| C | 2.892998  | 0.056006  | -2.244522 | C  | 4.569620  | -2.903092 | 4.389387 |
| C | 1.600580  | -0.060752 | -1.770246 | C  | 3.296104  | -2.523476 | 3.967095 |
| H | 2.715855  | -1.568130 | 0.609093  | H  | 4.018492  | 0.610062  | 2.861086 |
| H | 4.508782  | 1.235290  | 0.532656  | H  | 6.257398  | -0.053128 | 3.586432 |
| H | 4.956381  | 0.619090  | -1.826587 | H  | 6.647364  | -2.312234 | 4.585186 |
| H | 3.105715  | -0.204876 | -3.284083 | H  | 4.721691  | -3.892255 | 4.828564 |
| H | 0.810097  | -0.406291 | -2.435181 | H  | 2.458580  | -3.216302 | 4.082844 |
| C | -1.271452 | -0.070944 | -0.093903 | C  | 0.759871  | -0.545175 | 4.207920 |
| C | -2.376268 | 0.453303  | 0.623052  | C  | -0.585822 | -0.142284 | 4.071418 |
| C | -3.675048 | 0.057072  | 0.320837  | C  | -1.346952 | 0.241089  | 5.176214 |
| C | -3.914398 | -0.877007 | -0.697807 | C  | -0.784508 | 0.258465  | 6.455146 |
| C | -2.833954 | -1.419065 | -1.398621 | C  | 0.553185  | -0.111257 | 6.608803 |
| C | -1.526688 | -1.034122 | -1.096045 | C  | 1.310827  | -0.505756 | 5.503376 |
| H | -2.197341 | 1.191709  | 1.405392  | H  | -1.041850 | -0.092529 | 3.087758 |
| H | -4.512055 | 0.483668  | 0.879343  | H  | -2.384481 | 0.550275  | 5.028499 |
| H | -4.935851 | -1.185581 | -0.933421 | H  | -1.377870 | 0.569818  | 7.318347 |
| H | -3.005775 | -2.163346 | -2.180377 | H  | 1.021593  | -0.087189 | 7.596066 |
| H | -0.700050 | -1.502280 | -1.624922 | H  | 2.353614  | -0.774689 | 5.658396 |
| P | 1.741775  | 1.102310  | 2.028538  | Mo | 2.199490  | 3.247352  | 3.247683 |
| C | 1.617932  | -0.932162 | 3.017700  | C  | 2.475921  | 5.064055  | 4.067589 |
| C | 1.096148  | -1.829829 | 2.000848  | O  | 2.623928  | 6.113425  | 4.522706 |
| C | 2.083121  | -2.386281 | 0.999837  | C  | 0.267054  | 3.235695  | 3.978032 |
| C | 1.488007  | -3.175720 | -0.118190 | O  | -0.806124 | 3.280515  | 4.378896 |
| C | 0.199124  | -3.582532 | -0.100208 | C  | 1.533729  | 4.110079  | 1.501460 |
| C | -0.663159 | -3.210012 | 0.994213  | O  | 1.166012  | 4.573956  | 0.517791 |
| C | -0.223906 | -2.361209 | 1.983683  | C  | 4.117839  | 3.278873  | 2.537754 |
| H | 2.825236  | -3.027608 | 1.519825  | O  | 5.202790  | 3.292619  | 2.152717 |
| H | 2.153375  | -3.461559 | -0.937615 | C  | 2.900988  | 2.363764  | 4.972495 |
| H | -0.203433 | -4.193866 | -0.912177 | O  | 3.342074  | 1.925739  | 5.937993 |

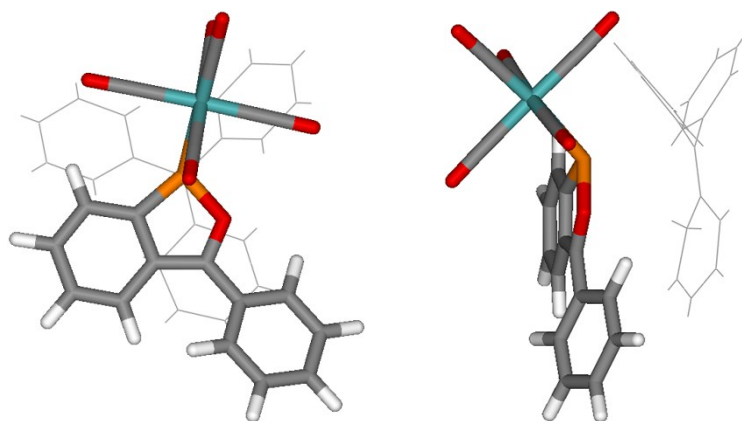

**11e-12:**

$E = -2281.31428496599$  au

$ZPE = 0.51667202$  au

|   |           |           |           |    |           |           |           |
|---|-----------|-----------|-----------|----|-----------|-----------|-----------|
| C | 0.132326  | 0.338475  | -0.030816 | H  | -2.406764 | -2.956628 | 2.068148  |
| O | 0.078834  | 0.868230  | 1.184317  | H  | -0.929708 | -2.361173 | 3.911986  |
| C | 1.467435  | 0.093028  | -0.455819 | C  | 3.162845  | -1.511252 | 3.577707  |
| C | 2.414205  | 0.498439  | 0.551299  | C  | 3.766988  | -0.305609 | 4.000864  |
| C | 3.800947  | 0.291657  | 0.351395  | C  | 5.134510  | -0.081649 | 3.851105  |
| C | 4.231957  | -0.294753 | -0.821826 | C  | 5.952853  | -1.073487 | 3.296714  |
| C | 3.301935  | -0.723849 | -1.809562 | C  | 5.384549  | -2.292668 | 2.918748  |
| C | 1.946017  | -0.544717 | -1.635572 | C  | 4.010016  | -2.508480 | 3.057146  |
| H | 2.344225  | -2.220719 | 1.101877  | C  | 3.146461  | 0.466126  | 4.450457  |
| H | 4.515385  | 0.580150  | 1.123898  | H  | 5.563401  | 0.873257  | 4.164452  |
| H | 5.300349  | -0.451127 | -0.989369 | H  | 7.025061  | -0.901054 | 3.174754  |
| H | 3.669998  | -1.216831 | -2.712091 | H  | 6.014398  | -3.088014 | 2.511790  |
| H | 1.250752  | -0.920762 | -2.384374 | H  | 3.600724  | -3.478940 | 2.780338  |
| C | -1.152523 | 0.062233  | -0.661254 | C  | 1.062758  | -1.023212 | 4.875766  |
| C | -2.297585 | -0.066878 | 0.155012  | C  | -0.018856 | -0.130083 | 4.748615  |
| C | -3.536561 | -0.364536 | -0.407116 | C  | -0.560737 | 0.512479  | 5.863149  |
| C | -3.661947 | -0.527617 | -1.792201 | C  | -0.032003 | 0.275627  | 7.135449  |
| C | -2.538867 | -0.372725 | -2.612950 | C  | 1.044009  | -0.606810 | 7.280401  |
| C | -1.294491 | -0.076716 | -2.056912 | C  | 1.588188  | -1.243149 | 6.162787  |
| H | -2.195807 | 0.045038  | 1.234156  | H  | -0.429849 | 0.073677  | 3.759386  |
| H | -4.410642 | -0.476111 | 0.239106  | H  | -1.389340 | 1.212867  | 5.731274  |
| H | -4.634098 | -0.763612 | -2.231953 | H  | -0.448833 | 0.783726  | 8.008611  |
| H | -2.634132 | -0.472572 | -3.696871 | H  | 1.467171  | -0.796182 | 8.270420  |
| H | -0.441861 | 0.080348  | -2.716020 | H  | 2.437172  | -1.920399 | 6.283995  |
| P | 1.582574  | 1.042049  | 2.002362  | Mo | 1.782049  | 3.388754  | 2.934462  |
| C | 1.688376  | -1.669900 | 3.684410  | C  | 1.905998  | 5.306421  | 3.503019  |
| C | 0.922068  | -2.311974 | 2.733420  | O  | 1.974730  | 6.419218  | 3.804856  |
| C | 1.493503  | -2.840407 | 1.426594  | C  | -0.244972 | 3.337302  | 3.299367  |
| C | 0.497440  | -2.980954 | 0.309708  | O  | -1.370337 | 3.273336  | 3.521962  |
| C | -0.829728 | -2.994915 | 0.533765  | C  | 1.454946  | 3.949893  | 0.980363  |
| C | -1.336147 | -2.832618 | 1.886493  | O  | 1.267555  | 4.228737  | -0.117839 |
| C | -0.509327 | -2.506706 | 2.916388  | C  | 3.805593  | 3.298572  | 2.601956  |
| H | 1.931853  | -3.847024 | 1.587033  | O  | 4.939371  | 3.219391  | 2.423298  |
| H | 0.898485  | -3.131943 | -0.695812 | C  | 2.093606  | 2.787598  | 4.878080  |
| H | -1.537389 | -3.129112 | -0.287540 | O  | 2.282181  | 2.498209  | 5.974555  |

**TS(8e-11e-12):**

$E = -2281.28046186946$  au

$ZPE = 0.51326185$  au

$\nu = -833.08$  cm<sup>-1</sup>

|   |           |           |           |   |           |           |           |
|---|-----------|-----------|-----------|---|-----------|-----------|-----------|
| C | -0.340557 | 0.467323  | 0.430522  | H | 2.096455  | -1.797120 | 0.799704  |
| O | 0.212477  | 0.930953  | 1.604147  | H | 4.055798  | -0.440446 | -0.168301 |
| C | 0.591804  | -0.126349 | -0.411770 | H | 3.777248  | -0.925409 | -2.568904 |
| C | 1.899345  | -0.320138 | 0.231742  | H | 1.492198  | -1.031725 | -3.588766 |
| C | 3.060668  | -0.469707 | -0.610221 | H | -0.498921 | -0.422906 | -2.295052 |
| C | 2.901835  | -0.752705 | -1.938747 | C | -1.777349 | 0.655227  | 0.316524  |
| C | 1.588809  | -0.800176 | -2.525215 | C | -2.415420 | 1.648129  | 1.093023  |
| C | 0.469908  | -0.485176 | -1.799297 | C | -3.794089 | 1.836000  | 1.011740  |

|   |           |           |           |    |           |           |           |
|---|-----------|-----------|-----------|----|-----------|-----------|-----------|
| C | -4.569155 | 1.038651  | 0.160509  | H  | 0.601824  | 1.215721  | 4.237279  |
| C | -3.950691 | 0.039458  | -0.600439 | H  | 0.899907  | 2.363470  | 6.403189  |
| C | -2.572528 | -0.156967 | -0.521128 | H  | 2.542917  | 1.481061  | 8.071701  |
| H | -1.812980 | 2.271332  | 1.755478  | H  | 3.870416  | -0.561312 | 7.525481  |
| H | -4.269307 | 2.613023  | 1.616202  | H  | 3.585802  | -1.687347 | 5.344089  |
| H | -5.649899 | 1.188105  | 0.097467  | C  | 0.467493  | -1.684965 | 3.374084  |
| H | -4.549507 | -0.604038 | -1.250184 | C  | -0.307793 | -2.010538 | 2.247192  |
| H | -2.115900 | -0.971722 | -1.083425 | C  | -1.555757 | -2.625218 | 2.368707  |
| P | 1.833950  | 0.520373  | 1.848569  | C  | -2.060249 | -2.957785 | 3.627093  |
| C | 1.838586  | -0.999707 | 3.294375  | C  | -1.296036 | -2.666024 | 4.759903  |
| C | 2.939055  | -1.780048 | 2.685604  | C  | -0.057199 | -2.032562 | 4.634767  |
| C | 4.282555  | -1.373525 | 2.796804  | H  | 0.043775  | -1.783495 | 1.247528  |
| C | 5.284789  | -1.936077 | 2.006974  | H  | -2.134250 | -2.837238 | 1.466404  |
| C | 4.978560  | -2.927818 | 1.046019  | H  | -3.036235 | -3.439506 | 3.724436  |
| C | 3.672308  | -3.319402 | 0.859963  | H  | -1.665686 | -2.925748 | 5.755231  |
| C | 2.597351  | -2.683409 | 1.592364  | H  | 0.508441  | -1.811025 | 5.538732  |
| H | 4.556675  | -0.606000 | 3.519308  | Mo | 3.233174  | 2.611382  | 2.067327  |
| H | 6.317599  | -1.606451 | 2.138013  | C  | 4.185478  | 4.381362  | 2.022287  |
| H | 5.780860  | -3.382400 | 0.459791  | O  | 4.714208  | 5.406332  | 1.985124  |
| H | 3.419720  | -4.089443 | 0.127306  | C  | 1.620345  | 3.505064  | 2.984879  |
| H | 1.689743  | -3.285874 | 1.714602  | O  | 0.726267  | 4.005424  | 3.504139  |
| C | 2.121345  | -0.278956 | 4.601862  | C  | 2.446912  | 3.005252  | 0.206499  |
| C | 1.352335  | 0.847973  | 4.939208  | O  | 2.017515  | 3.220675  | -0.836509 |
| C | 1.502842  | 1.482098  | 6.171662  | C  | 4.869768  | 1.722019  | 1.209854  |
| C | 2.419221  | 0.986250  | 7.105322  | O  | 5.816850  | 1.260266  | 0.748037  |
| C | 3.165481  | -0.153461 | 6.796810  | C  | 4.092876  | 2.221720  | 3.898631  |
| C | 3.014778  | -0.782982 | 5.556705  | O  | 4.652933  | 2.055705  | 4.887080  |

**11e (level B):**  $E = -1549.31452582279$  au  
 $ZPE = 0.22567912$  au

|   |           |           |           |    |           |           |           |
|---|-----------|-----------|-----------|----|-----------|-----------|-----------|
| C | 0.152105  | 0.166079  | 0.486418  | H  | -1.983083 | 1.105156  | 1.790699  |
| O | 0.395871  | 0.312328  | 1.764080  | H  | -4.376149 | 0.800556  | 1.188873  |
| C | 1.318815  | 0.265546  | -0.327981 | H  | -4.995873 | -0.529939 | -0.829315 |
| C | 2.488485  | 0.462142  | 0.476656  | H  | -3.213778 | -1.572442 | -2.228381 |
| C | 3.747865  | 0.598743  | -0.145721 | H  | -0.832134 | -1.285499 | -1.626648 |
| C | 3.824060  | 0.576594  | -1.528433 | P  | 2.083366  | 0.512717  | 2.213735  |
| C | 2.662675  | 0.420752  | -2.328871 | Mo | 2.179962  | 3.002079  | 2.969585  |
| C | 1.421050  | 0.267973  | -1.745066 | C  | 2.225925  | 4.919231  | 3.527283  |
| H | 4.649186  | 0.742513  | 0.453425  | O  | 2.247657  | 6.031515  | 3.842996  |
| H | 4.794713  | 0.698240  | -2.015804 | C  | 0.237968  | 2.819649  | 3.625494  |
| H | 2.754093  | 0.433340  | -3.416997 | O  | -0.855092 | 2.714890  | 3.966947  |
| H | 0.530636  | 0.175065  | -2.366273 | C  | 1.468090  | 3.483279  | 1.104285  |
| C | -1.243417 | -0.038398 | 0.105163  | O  | 1.060201  | 3.718566  | 0.055213  |
| C | -2.257874 | 0.522801  | 0.909711  | C  | 4.103489  | 3.131921  | 2.262834  |
| C | -3.597526 | 0.350797  | 0.568745  | O  | 5.176586  | 3.205106  | 1.854024  |
| C | -3.944170 | -0.394505 | -0.565386 | C  | 2.877670  | 2.407133  | 4.811549  |
| C | -2.944788 | -0.972998 | -1.355692 | O  | 3.263577  | 2.079244  | 5.843543  |
| C | -1.600615 | -0.797308 | -1.027289 |    |           |           |           |

**12 (level B):**  $E = -731.969326563749$  au  
 $ZPE = 0.28942785$  au

|   |           |           |           |   |          |           |           |
|---|-----------|-----------|-----------|---|----------|-----------|-----------|
| H | -0.003193 | -0.014078 | 0.004402  | H | 3.420974 | 2.617568  | -0.310022 |
| C | 2.704124  | 0.004029  | -0.037182 | C | 2.269198 | -1.366317 | 0.340372  |
| C | 1.863923  | 1.088630  | -0.026566 | C | 2.638615 | -2.463602 | -0.465517 |
| C | 0.379761  | 0.977888  | 0.292202  | C | 2.245653 | -3.761980 | -0.139626 |
| C | -0.472418 | 2.065489  | -0.307022 | C | 1.488375 | -4.000215 | 1.013893  |
| C | 0.058296  | 3.228408  | -0.730404 | C | 1.133174 | -2.926836 | 1.836458  |
| C | 1.498009  | 3.446116  | -0.647845 | C | 1.517511 | -1.625260 | 1.502128  |
| C | 2.345130  | 2.435298  | -0.325079 | H | 3.235450 | -2.286827 | -1.363223 |
| H | 0.227614  | 1.022810  | 1.391225  | H | 2.533098 | -4.593831 | -0.788115 |
| H | -1.554201 | 1.901161  | -0.326927 | H | 1.183204 | -5.017480 | 1.272373  |
| H | -0.578543 | 4.027462  | -1.119837 | H | 0.556744 | -3.102913 | 2.748534  |
| H | 1.895865  | 4.439196  | -0.874179 | H | 1.252864 | -0.802381 | 2.167718  |



|   |          |           |           |   |          |           |           |
|---|----------|-----------|-----------|---|----------|-----------|-----------|
| C | 4.125088 | 0.109872  | -0.474847 | H | 3.687768 | 1.054334  | -2.369617 |
| C | 4.475305 | 0.673498  | -1.715923 | H | 6.058920 | 1.168564  | -3.098136 |
| C | 5.809926 | 0.731991  | -2.127315 | H | 7.866153 | 0.271558  | -1.626441 |
| C | 6.822179 | 0.226283  | -1.305461 | H | 7.272286 | -0.747955 | 0.575134  |
| C | 6.488205 | -0.346893 | -0.072501 | H | 4.897969 | -0.868310 | 1.292268  |
| C | 5.153928 | -0.411619 | 0.333089  |   |          |           |           |

**12 (level A):**  $E = -732.244133942917$  au  
 $ZPE = 0.28878824$  au

|   |           |           |           |   |          |           |           |
|---|-----------|-----------|-----------|---|----------|-----------|-----------|
| H | 0.015734  | -0.016021 | 0.052953  | C | 1.556740 | -1.621180 | 1.512079  |
| C | 2.701600  | 0.006654  | -0.038978 | H | 3.162263 | -2.268345 | -1.394471 |
| C | 1.870031  | 1.083428  | -0.017379 | H | 2.465409 | -4.557894 | -0.819800 |
| C | 0.391703  | 0.976101  | 0.306966  | H | 1.196080 | -4.986802 | 1.268591  |
| C | -0.455618 | 2.037631  | -0.336920 | H | 0.637330 | -3.093887 | 2.769817  |
| C | 0.071539  | 3.189654  | -0.765038 | H | 1.318705 | -0.807241 | 2.183078  |
| C | 1.501377  | 3.423762  | -0.647024 | C | 4.119034 | 0.111778  | -0.471676 |
| C | 2.345442  | 2.428462  | -0.307553 | C | 4.472429 | 0.687785  | -1.696449 |
| H | 0.243844  | 1.064637  | 1.394150  | C | 5.800833 | 0.745212  | -2.102500 |
| H | -1.523563 | 1.859970  | -0.384384 | C | 6.803963 | 0.226485  | -1.290377 |
| H | -0.555385 | 3.966029  | -1.186599 | C | 6.466468 | -0.356912 | -0.071726 |
| H | 1.889514  | 4.410820  | -0.866656 | C | 5.138072 | -0.420699 | 0.327286  |
| H | 3.409737  | 2.616531  | -0.276410 | H | 3.695786 | 1.078649  | -2.340565 |
| C | 2.266350  | -1.360168 | 0.334954  | H | 6.050667 | 1.188926  | -3.058318 |
| C | 2.598366  | -2.445747 | -0.487634 | H | 7.838696 | 0.269552  | -1.606095 |
| C | 2.209128  | -3.737200 | -0.161351 | H | 7.239768 | -0.765994 | 0.566649  |
| C | 1.495216  | -3.978954 | 1.009845  | H | 4.881917 | -0.885444 | 1.271159  |
| C | 1.177782  | -2.915922 | 1.848387  |   |          |           |           |

**13 (level B):**  $E = -732.014223959441$  au  
 $ZPE = 0.29098534$  au

|   |           |           |           |   |           |           |           |
|---|-----------|-----------|-----------|---|-----------|-----------|-----------|
| C | -0.080184 | -0.170667 | 0.095640  | H | 0.927911  | -2.505359 | -1.041472 |
| C | -0.014187 | -0.151157 | 1.620345  | H | 3.195266  | -2.879444 | -1.973034 |
| C | 0.931221  | -0.896275 | 2.338508  | H | 4.858910  | -1.017901 | -2.016667 |
| C | 0.929705  | -0.893523 | 3.738148  | H | 4.222664  | 1.225213  | -1.116539 |
| C | -0.015539 | -0.140164 | 4.440123  | H | 1.954563  | 1.588248  | -0.172200 |
| C | -0.961233 | 0.611044  | 3.732028  | C | -1.163377 | -1.111582 | -0.421842 |
| C | -0.958510 | 0.602580  | 2.335310  | C | -1.510457 | -2.290837 | 0.252410  |
| H | 1.678702  | -1.482544 | 1.800031  | C | -2.473824 | -3.158462 | -0.273622 |
| H | 1.674774  | -1.481395 | 4.280969  | C | -3.109414 | -2.856151 | -1.481574 |
| H | -0.014147 | -0.134250 | 5.533266  | C | -2.774000 | -1.678915 | -2.160278 |
| H | -1.702446 | 1.207826  | 4.270433  | C | -1.808963 | -0.816948 | -1.632924 |
| H | -1.703376 | 1.187199  | 1.787365  | H | -1.025796 | -2.532998 | 1.200367  |
| C | 1.282912  | -0.433249 | -0.539044 | H | -2.730288 | -4.073439 | 0.266952  |
| C | 1.648488  | -1.685256 | -1.051306 | H | -3.865528 | -3.531425 | -1.890405 |
| C | 2.928698  | -1.895516 | -1.577954 | H | -3.268174 | -1.430186 | -3.103216 |
| C | 3.860629  | -0.854556 | -1.602658 | H | -1.548339 | 0.099714  | -2.169930 |
| C | 3.503416  | 0.401934  | -1.097884 | H | -0.375441 | 0.844310  | -0.215235 |
| C | 2.226443  | 0.606743  | -0.571601 |   |           |           |           |

**13 (level A):**  $E = -732.287794868867$  au  
 $ZPE = 0.2900941$  au

|   |           |           |          |   |           |           |           |
|---|-----------|-----------|----------|---|-----------|-----------|-----------|
| C | -0.066219 | -0.174519 | 0.112093 | H | 1.781802  | -1.342115 | 4.277641  |
| C | -0.003893 | -0.172886 | 1.634581 | H | -0.007421 | -0.160863 | 5.522147  |
| C | 0.996990  | -0.827742 | 2.347755 | H | -1.795043 | 1.019237  | 4.268871  |
| C | 0.994989  | -0.826712 | 3.740801 | H | -1.792438 | 1.002432  | 1.804150  |
| C | -0.007635 | -0.165436 | 4.439454 | C | 1.286054  | -0.448645 | -0.529521 |
| C | -1.011037 | 0.496426  | 3.735127 | C | 1.665236  | -1.716616 | -0.964826 |
| C | -1.006530 | 0.489549  | 2.346682 | C | 2.932445  | -1.935933 | -1.498093 |
| H | 1.786604  | -1.341872 | 1.816560 | C | 3.838237  | -0.886952 | -1.607271 |

|   |           |           |           |   |           |           |           |
|---|-----------|-----------|-----------|---|-----------|-----------|-----------|
| C | 3.465973  | 0.385781  | -1.182696 | C | -3.111979 | -2.787329 | -1.500687 |
| C | 2.200602  | 0.599075  | -0.650208 | C | -2.747402 | -1.621661 | -2.169189 |
| H | 0.967717  | -2.540364 | -0.891215 | C | -1.778148 | -0.784175 | -1.630305 |
| H | 3.209086  | -2.928677 | -1.830982 | H | -1.073858 | -2.507317 | 1.192478  |
| H | 4.822962  | -1.056623 | -2.024093 | H | -2.780735 | -4.003713 | 0.239075  |
| H | 4.160223  | 1.212485  | -1.269066 | H | -3.868309 | -3.440929 | -1.916643 |
| H | 1.917512  | 1.591201  | -0.317643 | H | -3.220364 | -1.363694 | -3.108650 |
| C | -1.158035 | -1.091772 | -0.418491 | H | -1.496343 | 0.120670  | -2.156495 |
| C | -1.534917 | -2.257366 | 0.246004  | H | -0.342854 | 0.841140  | -0.183583 |
| C | -2.502189 | -3.101475 | -0.291256 |   |           |           |           |
